# Supplementary material
Source: bioRxiv or medRxiv preprint supplement (https://www.biorxiv.org/highwire/filestream/73621/field_highwire_adjunct_files/0/240226-1.pdf)
Supplement: Supplementary file [file 240226-1.pdf]

## Nanjinganthus: An Unexpected Flower from the Jurassic of China

Qiang FU<sup>1</sup>, José Bienvenido DIEZ<sup>2</sup>, Mike POLE<sup>3</sup>, Manuel GARCÍA-ÁVILA<sup>4</sup>, Zhong-Jian LIU<sup>5\*</sup>, Hang CHU<sup>6</sup>, Yemao Hou<sup>7</sup>, Pengfei YIN<sup>7</sup>, Guo-Qiang ZHANG<sup>5</sup>, Kaihe DU<sup>8</sup>, Xin WANG<sup>1\*</sup>

<sup>1</sup>Lead contact, CAS Key Laboratory of Economic Stratigraphy and Paleogeography, Nanjing Institute of Geology and Palaeontology, CAS, Nanjing 210008, China,

<sup>2</sup>Departamento de Geociencias, Universidad de Vigo, Vigo 36200, Spain

<sup>3</sup>Queensland Herbarium, Mount Coot-tha Road, Toowong QLD 4066, Australia

<sup>4</sup>Facultade de Bioloxía, Asociación Paleontolóxica Galega, Universidade de Vigo, 36310, Vigo, Spain

<sup>5</sup>Shenzhen Key Laboratory for Orchid Conservation and Utilization, National Orchid Conservation Center of China and Orchid Conservation and Research Center of Shenzhen, Shenzhen 518114, China

<sup>6</sup>Tianjin Center, China Geological Survey, Tianjin 300170, China

<sup>7</sup>Key Laboratory of Vertebrate Evolution and Human Origin of Chinese Academy of Sciences, Institute of Vertebrate Paleontology and Paleoanthropology, Beijing 100044, China

<sup>8</sup>Jiangsu Key Laboratory for Supramolecular Medicinal Materials and Applications, College of Life Sciences, Nanjing Normal University, Nanjing, China

\*Corresponding author contact information:

**Zhong-Jian Liu**, Email: liuzj@sinicaorchid.org

Senior author, **Xin Wang**, xinwang@nigpas.ac.cn

### Geological background

Initially, what is now known as the Xiangshan Group was called the “Nanking Sandstein” by Richthofen in 1868. Liu and Zhao [1] thought that the Nanking Sandstein belonged to the Jurassic and renamed it the “Chung Shan Formation”. Hsieh [2] subdivided the Chung Shan Formation into six units, namely, in ascending order, Huang Ma Ching Shale, Quartzitic Conglomerate, Tzu Hsia Tung Series, Lingku ssu Shale, Light Yellow Sandstone, Variegated Sandstone and Shale. Li et al. [3] found fossil plants including *Equisetites*, *Neocalamites*, *Cladophlebis*, *Otozamites*, *Pterophyllum*, *Dictyophyllum*, *Pagiophyllum*, *Baiera guilhaumatii*, and *Podozamites lanceolatus*. They also changed the “Chung Shan Formation” to “Xiangshan Layers”, and regarded its age as being Early Jurassic. Sze and Chow [4] used the term “Xiangshan Group” for the previous “Xiangshan Layers”, and this has been the convention followed ever since. The age of the Xiangshan Group has been thought by various authors to range from the Late Triassic to the Middle Jurassic. Ju [5] divided the Xiangshan Group into a lower South Xiangshan Formation and an upper North Xiangshan Formation, respectively. The standard section of the lower part of the Xiangshan Group (the South Xiangshan Formation, the Lower Jurassic) is 394 metres thick in South Xiangshan in Nanjing, and has yielded abundant fossil plants. The standard section of the upper part of the Xiangshan Group (the North Xiangshan Formation, the Middle Jurassic) is in North Xiangshan in Nanjing. It is 1005 metres thick, and has only yielded a few stem fossils [5]. Based on fossil plants, Cao [6] thought that the age of the South Xiangshan Formation could not be later than the Early Jurassic, and considering that the early Early Jurassic flora (in the middle and lower parts of the Guanyintan Formation in southwest Hunan) [7] is biostratigraphically below the South Xiangshan Formation, Cao [6] regarded the age of the Xiangshan Group as middle-late Early Jurassic.

The South Xiangshan Formation (lower part of the Xiangshan Group) has yielded abundant bivalve and plant fossils. Its outcrops are scattered in Jiangning, Longtan, and Zhenjiang (all in the suburbs of Nanjing). In these areas, the outcrops are well exposed and especially fossiliferous near the South Xiangshan and Cangbomen regions. The formation includes sandstones, siltstones, shales, carbonaceous shales, and coal seams. There are abundant plant fossils in the South Xiangshan Formation, and almost all of the plants in the Xiangshan Group are from this formation. Various authors have collected fossil plants of the Xiangshan Flora [5, 6, 8-12]. According to Cao [6, 11, 12], Wang et al. [8], and Ju [5], the Xiangshan Group includes at least 46 genera of plants and is very similar to the flora of the Hsiangchi Group in western Hubei. Cycadophytes (34%) dominate the flora, and ferns are the second most dominant group (20%), among which Dipteridaceae play an important role. Ginkgoales are also abundant (19%) [5]. The important and frequently observed taxa include *Hysterites*, *Selaginellites*, *Equisetites* cf. *lateralis*, *E. aff. multidentatus* Oishi, *E. sarrani* (Zeiller) Halle, *Neocalamites hoerensis* (Schimper) Halle, *N. dangyangensis* Chen, *Marattiopsis asiatica* Kawasaki, *M. hoerensis* (Schimper) Schimper, *Todites goeppertianus* (Münster) Krasser, *T. princeps* (Presl) Gothan, *Osmundopsis* Harris, *Cladophlebis denticulata* (Brongniart) Fontaine, *C. goeppertianus* (Münster) Krasser, *C. raciborskii* Zeiller, *Spiropteris* Schimper, *Phlebopteris polypodioides* Brongniart, *Danaeopsis* Heer ex Schimper, *Thaumatopteris pusilla* (Nathorst) Oishi et Yamasita, *Dictyophyllum nathorstii* Zeiller, *D. nilssonii* (Brongniart) Goepfert, *Clathropteris meniscioides* Brongniart, *Cl. platyphylla* Goepfert, *Cl. obovata* Oishi, *Coniopteris hymenophylloides* (Brongniart) Seward, *Thinnfeldia* Ettingshausen, *Augustiphyllum yaobuensis* Huang, *Scoresbya dentata* Harris, *Pterophyllum firmifolium* Ye, *Pt. propinquum* Goepfert, *Pt. subaequale* Hartz, *Nilssonia complicatis* Li, *N. orientalis* Heer, *N. minor* Harris, *N. cf. compta* (Schenk) Ye, *N. cf.*

*polymorpha* Schenk, *N. pterophylloides* Nathorst, *N. cf. saighanensis* Seward, *N. taeniopteroides* Halle, *N. parabrevis* Huang, *N. moshanensis* Huang, *Nilssoniopteris vittata* (Brongn.) Florin, *Ctenis* Lindley et Hutton, *Ctenozamites* cf. *ptilozamioides* Zhou, *C. cf. cycadea* (Berger) Schenk, *Cycadolepis corrugata* Zeiller, *Anomozamites* cf. *minor* Nathorst, *A. cf. major* (Brong) Huang, *A. cf. inconstans* (Goepfert) Schimper, *A. quadratus* Cao, *Tyrmiathorax* (Schenk) Yeh, *T. latior* Ye, *T. lepida* Huang, *T. susongensis* Cao, *Otozamites minor* Tsao, *Ot. hsiangchiensis* Sze, *Ot. mixomorphus* Ye, *Ot. tangyanensis* Sze, *Ptilophyllum hsingshanense* (Wu) Cao, *Pt. contiguum* Sze, *Pt. pecten* (Philips) Morris, *Hsiangchiphylloides trinervis* Sze, *Ginkgoites* cf. *tasiakouensis* Wu et Li, *G. cf. sibiricus* (Heer) Seward, *G. cf. magnifolius* Du Tiot, *Baiera* cf. *furcata* (L. et H.) Braun, *B. asadai* Yabe et Oishi, *B. guilhaumatii* Zeiller, *B. multipartita* Sze et Lee, *B. cf. gracilis* Bunbury, *Sphenobaiera huangii* (Sze) Hsu et Li, *S. spectabilis* (Nath) Florin, *Czekanowskia rigida* Heer, *C. hartzii* Harris, *Phoenicopsis* Heer, *Ginkgodium Yokoyama*, *Desmiophyllum* Lesquereux, *Stenorachis* (Nathorst) Saporta, *Vittifolium multinerve* Zhou, *Pityophyllum longifolium* (Nathorst) Möller, *Podozamites lanceolatus* (L. et H.) Braun, *Ferganiella Prynada*, *Elatocladus* Halle, *Swedenborgia cryptomerioides* Nathorst, *Taeniopteris* cf. *richthofenii* (Schenk) Sze, *T. inouyei* Tateiwa, *Conites* and *Carpolithus*.

## Materials and methods

The fossils studied here were collected from an outcrop of the South Xiangshan Formation at a quarry owned by the Xiaoyetian Cement Company Ltd. in the northeastern suburb of Nanjing, Jiangsu, China (N32°08'19", E118°58'20") (Fig. S1). Plant fossils from the formation have been extensively studied by various scholars [4-6, 8-12], and our collection from the local outcrop indicates that the fossil plants closely associated with *Nanjinganthus* constitute a flora dominated by Dipteridaceae (*Clathropteris*) and various cycadophytes (mainly *Nilssonia*, *Ptilophyllum*, and *Pterophyllum*), which is consistent with previous works. Some of these associated plant fossils are shown in Figs. S3-S4.

The specimens were initially photographed using a Sony ILCE-7 digital camera. The sediment covering the specimens was dégaged using a JUN-AIR pneumatic drill, and the details of the fossils were observed and photographed using a Nikon SMZ1500 stereomicroscope equipped with a Digital Sight DS-Fi1 camera. Organically preserved sepals and petals were processed with 40% peroxide for cuticle analysis according to routine methods, and the processed cuticles and organic materials of the sepals and petals were observed and photographed using the Rhod fluorescent light in a Zeiss Z2 Imager with an AxioCam HRc camera. Extended-focus images were generated using the Z-stack function in AxioVs40x64 V4.9.1.0. The removed cuticles were coated with gold and observed using a Leo 1530 VP scanning electron microscope (SEM), and serial pictures were obtained after the internal details of the flower were exposed through grinding with the pneumatic drill. One of the organically-preserved petals was embedded in resin and sectioned for light microscopy and transmission electron microscopy (TEM). One fragment of the distal portion of a flower embedded in sediments was observed by Micro Computed Laminography (Micro-CL) to show the dendroid style embedded in the sediments. All photographs were saved in TIFF format and assembled for publication using Photoshop 7.0.

## Palynological assemblage

Preliminary analysis of the strata yielding *Nanjinganthus* has recognized abundant palynomorphs. The palynoflora includes *Alisporites robustus* Nilsson, *A. sp.*, *Araucariacites* spp., *Cerebropollenites macroverrucatus* (Thiergart) Schulz, *Chamatosporites hians* Nilsson, *C. sp.*, *Circulisporites parvus* (de Jersey) Norris, *Classopollis annulatus* (Verbitskaya) Li, *C. classoides* (Reissinger) Cornet & Traverse, *C. torosus* (Reissinger) Couper, *C. sp.*, *Combaculatisporites* spp., *Contignisporites* sp., *Cyathidites australis* Couper, *C. minor* Couper, *C. sp.*, *Cycadopites follicularis* Wilson & Webster, *C. sp.*, *Deltoidospora toralis*, *Densoisporites* spp., *Dictyophyllidites mortonii* (de Jersey) Playford & Dettmann, *Gleicheniidites senonicus* Ross, *G. sp.*, *Inaperturopollenites* sp., *Klukisporites variegatus* Couper, *Manumia delcourtii* (Pocock) Dybkjær, *Osmundacites* sp., *Perinopollenites elatoides* Couper, 1958, *Podocarpidites* sp., *Polycingulatisporites triangularis* (Bolchovitina) Playford & Dettmann, *Quadracirculina* sp., *Quadraeculina anellaeformis* Maljavkina, *Retriretiles clavatooides* (Couper) Doering, Krutzsch, *Sestrosporites pseudoalveolatus* (Couper) Dettmann, *Sterisporites* sp., *Striatella seebergensis* M ädler, *Todisporites* spp., and *Vitreisporites pallidus* (Fig. S2)[13]. This palynological assemblage suggests a latest Early Jurassic age for *Nanjinganthus*.

## Isotopic Dating

There was no previous isotopic age for the Xiangshang Group. We sampled the layers above the fossiliferous layers (Fig. S1b) and picked zircon grains for U/Pb dating. The zircon grains appeared to be reworked (Table S2), with ages ranging from 2738 Ma to 207 Ma (67 zircon grains with the concordance > 90% from 168 zircon grains), and 207 Ma (2 zircon grains) is the youngest age (Figs. S1f-g). Most of the zircon grains were of magmatic origin with oscillation internal belts and high Th/U values, implying a provenance of granitic rocks. So the upper limit age of *Nanjinganthus* is 207 Ma (the Late Triassic). Taking all dating information into consideration, we think that the age of *Nanjinganthus* falls in the scope ranging from 174 to 207 Ma and is close to the lower limit of the scope, namely, about 174 Ma (the latest Early Jurassic).

## Eliminating alternative interpretations

The Mesozoic was an age of gymnosperms, so the Jurassic age of *Nanjinganthus* necessitates a comparison with common fossil gymnosperms. The potential candidates for *Nanjinganthus* include Caytoniales, Corystospermales, Ginkgoales, Czekanowskiales, Coniferales, Iraniales, Pentoxiales, Bennettiales, and Gnetales.

*Caytonia* is a very intriguing fossil plant that has been frequently compared with angiosperms [14, 15]. Regardless of its ultimate position, *Caytonia* can be easily distinguished from *Nanjinganthus* by its cupule with an adaxial basal opening, bilateral reproductive organs, and lack of both a dendroid style and foliar appendages in its reproductive organs.

Corystospermales is usually considered as a Mesozoic seed fern group, unlike *Caytonia*, the cupules in most Corystospermales open on the abaxial and are rarely compared with angiosperms [16]. Corystospermales can be easily distinguished from *Nanjinganthus* by their cupule which has an abaxial basal opening, bilateral reproductive organs, and by the lack of both a dendroid style and foliar appendages in the reproductive organs.

Ginkgoales diversified greatly during the Mesozoic, and unlike extant *Ginkgo*, the Mesozoic relatives of *Ginkgo* are well represented by their reproductive organs, which are composed of ovules in clusters [17]. Mesozoic Ginkgoalean leaves are lobately segmented and inserted on the short shoot borne on woody branches. Ginkgoales can be easily

---

distinguished from *Nanjinganthus* by their clustered naked ovules, lobate leaves, woody growth habit, and lack of a dendroid style in the reproductive organs.

Cones in the Coniferales are usually penetrated by a central axis while the pedicel of *Nanjinganthus* terminates at the bottom of the reproductive organ. This difference alone is sufficient to distinguish Coniferales and *Nanjinganthus*.

Czekanowskiales are unique fossil plants restricted to the Mesozoic, but unlike the Ginkgoales, they have conspicuously narrow leaves arranged on a short shoot. Their reproductive organs are bivalvate cupules containing two rows of seeds. Czekanowskiales can be easily distinguished from *Nanjinganthus* by their bivalvate cupules, narrow leaves, woody growth habit, bilateral reproductive organs, and lack of both a dendroid style and foliar appendages in the reproductive organs.

*Irania* is the only genus of the Iraniales, which is assumed to have borne clusters of pollen sacs and fruits, from the Triassic-Jurassic [18]. Although no seeds have been observed in *Irania*, it is suspected to be an angiosperm. The female and male parts are not concentrated on the same axis, and do not constitute a flower-like structure, and it is unknown whether the ovules are enclosed. These features distinguish *Irania* from *Nanjinganthus*.

Pentoxylales are Mesozoic woody fossil plants characterized by a stem with five steles [16]. Their leaves are of the *Taeniopteris*-type, and the reproductive organs are cones with numerous naked orthotropous ovules/seeds helically arranged along the axes of their cones. Pentoxylales can be easily distinguished from *Nanjinganthus* by their cones without any foliar appendages, *Taeniopteris*-type leaves, woody growth habit, cones, and lack of a dendroid style.

Bennettitales are important Mesozoic gymnosperms that are frequently argued to be related to angiosperms [19, 20]. Their leaves are pinnate compound, and the reproductive organs are characterized by orthotropous ovules with micropylar tubes surrounded by interseminal scales, and these parts are helically arranged along the cone axis. Bennettitales can be distinguished from *Nanjinganthus* by their cones with ovules bearing micropylar tubes, compound leaves, woody growth habit, and lack of a dendroid style [16].

Gnetales are important gymnosperms that diversified once in the Mesozoic, among which *Gnetum* has leaves that are difficult to distinguish from eudicots [21, 22]. The most diagnostic feature of Gnetales is their decussate arrangement of leaves and cone parts, and their leaves are either eudicot-like or with parallel veins. Like Bennettitales, the reproductive organs of Gnetales are characterized by orthotropous ovules with micropylar tubes surrounded by scales. Gnetales can be distinguished from *Nanjinganthus* by their cones with ovules with micropylar tubes, leaves with pinnate reticulate or parallel venation, woody/lianaous/shrubby growth habit, and lack of a dendroid style.

There are several reports of Jurassic angiosperms, including *Schmeissneria*[23], *Xingxueanthus*[24], *Juraherba*[25], and *Euanthus*[26]. These genera are from the Middle-Late Jurassic of northeastern China. The presence of hypanthium, inferior ovary, and dendroid style distinguish *Nanjinganthus* from all these Jurassic peers, justifying *Nanjinganthus* as a new genus.

In short, *Nanjinganthus* has little relationship with any known extant and extinct gymnosperms. This conclusion, the identification of angiospermous structures, and its Jurassic age justify *Nanjinganthus* as a new angiosperm from the Jurassic.

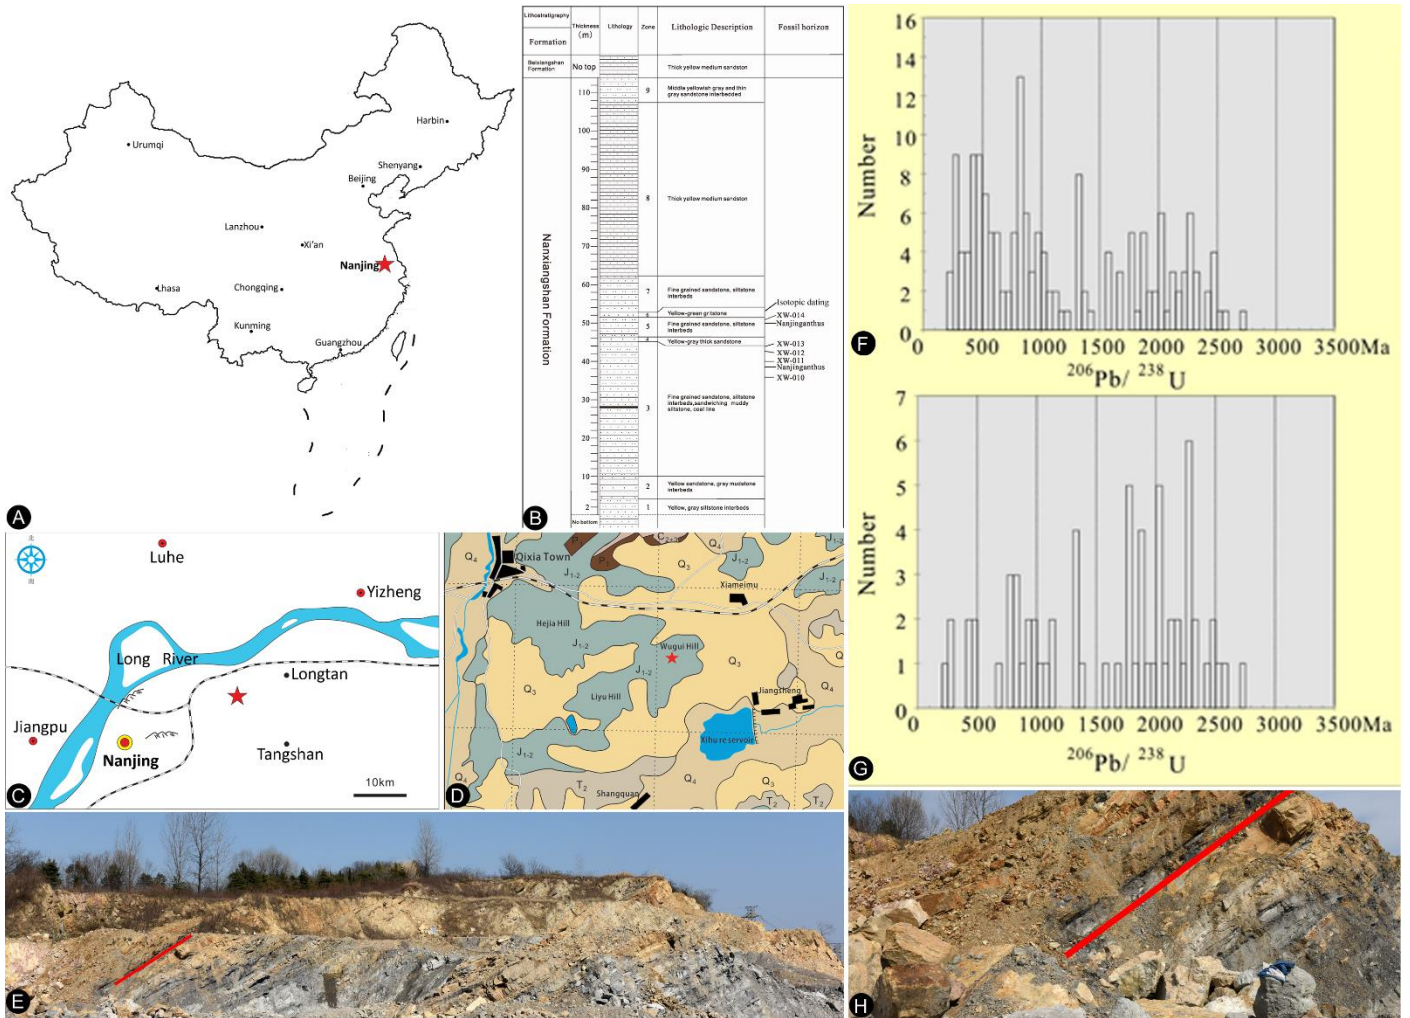

**Figure S1** The type fossil locality of *Nanjinganthus*, Nanjing in China and isotopic dating. **A.** Fossil locality (asterisk) in the suburb of Nanjing in eastern China. **B.** Stratigraphic column showing the fossiliferous strata, strata for isotopic dating, and layers (XW010 to XW014) sampled for palynological dating. **C.** Type locality (red asterisk, N32°08'19", E118°58'20") of *Nanjinganthus* in the suburbs of Nanjing, China. **D.** Geological map of the region near the type locality, dark green represents the outcrop of the Xiangshan Group. **E.** Fossiliferous strata (red line) of the South Xiangshan Formation exposed in the quarry of Xiaoyetian Cement Company Ltd. Note one of the strata (red line) yielding many flowers of *Nanjinganthus*. **F-G.** Comparison of relative probability plot of zircon data (F: all data; G: concordance > 90%). **H.** Close-up of one of the *Nanjinganthus*-yielding layers (red line).

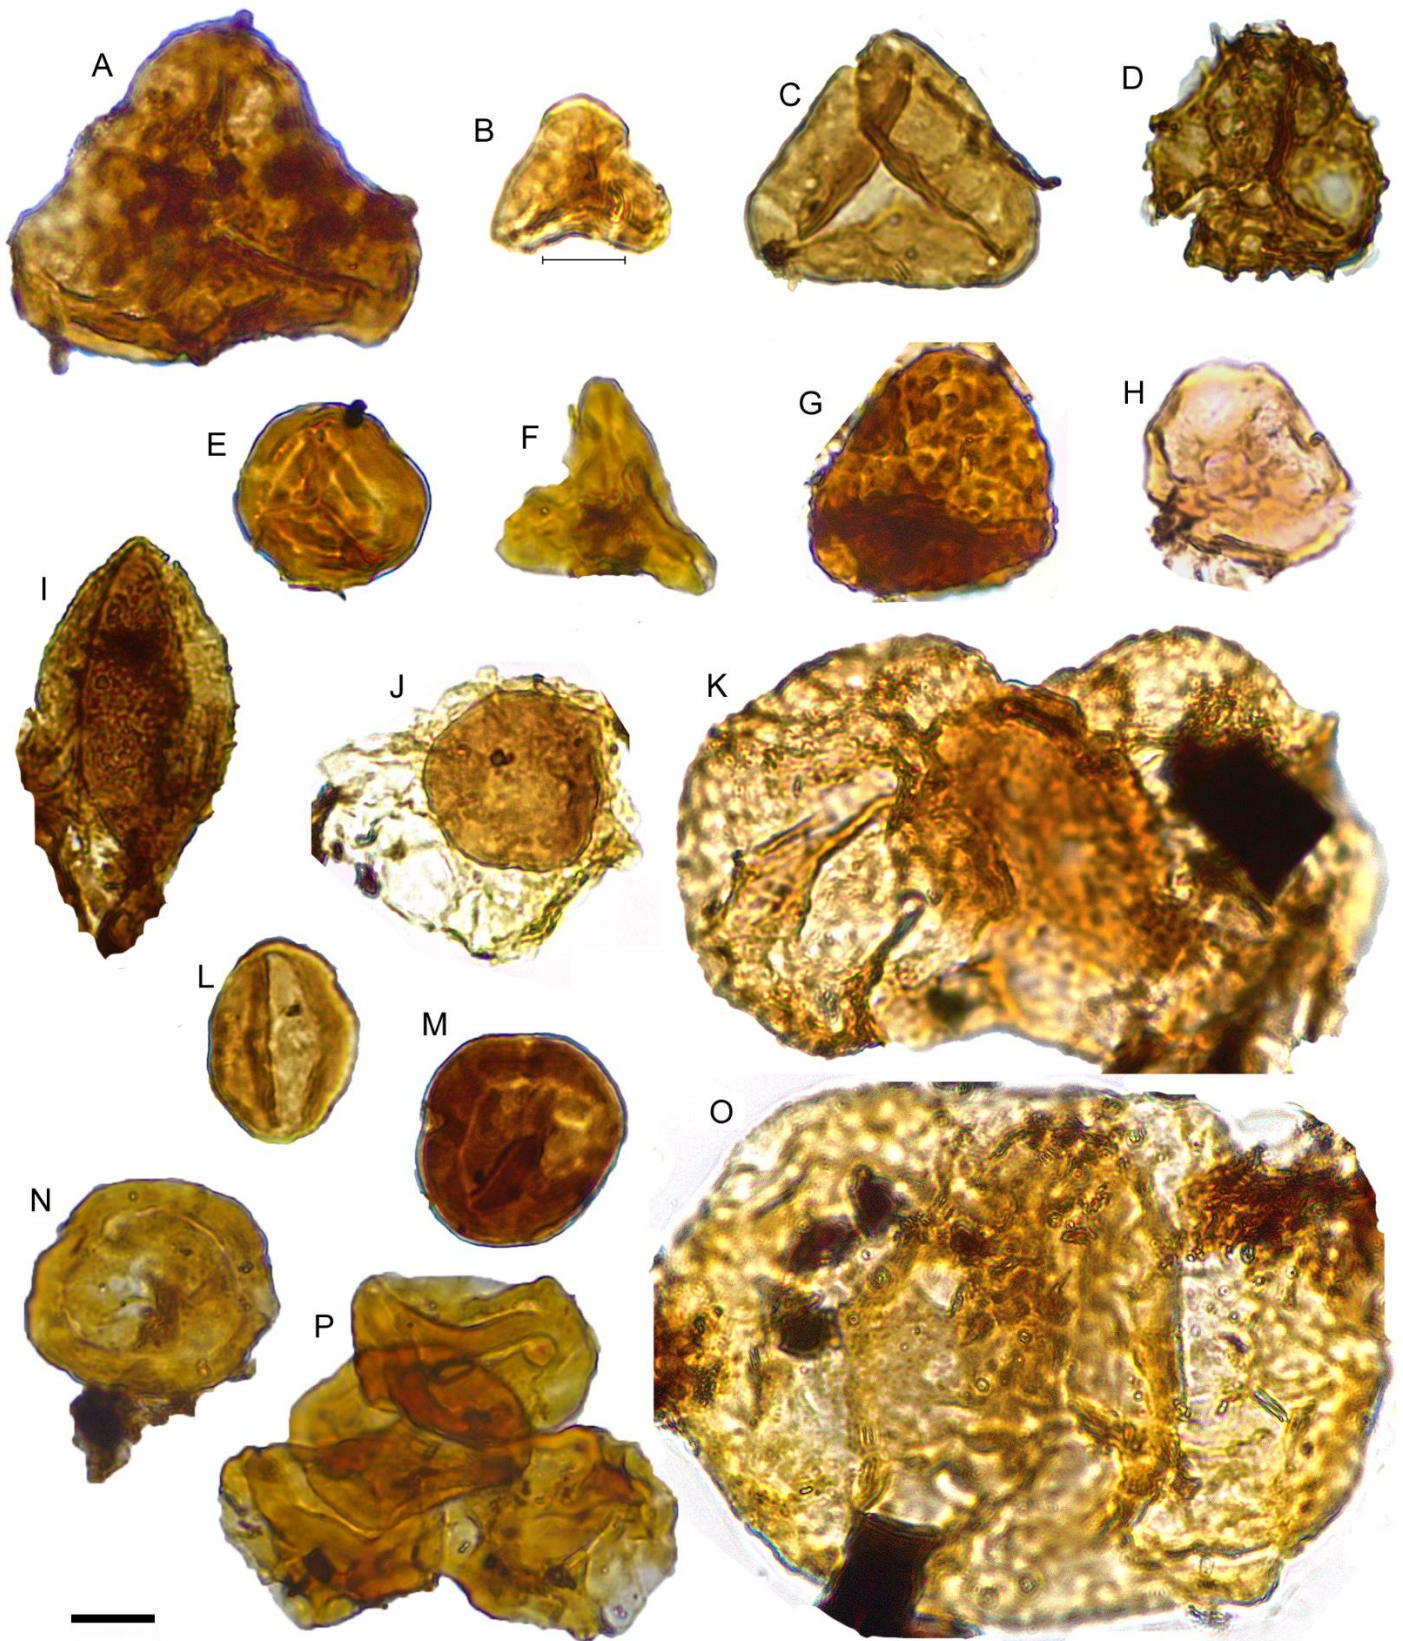

**Figure S2** Frequently observed palynomorphs associated with *Nanjinganthus*. Bar = 10  $\mu\text{m}$ .

**A.** *Cyathidites australis* Couper. **B.** *C. minor* Couper. **C.** *Deltoidospora* sp. **D.** *Retitriletes clavatoides* Döring. **E.** *Striatella seebergensis* Madler. **F.** *Gleicheniidites senonicus* Ross. **G.** *Manumia delcourtii* (Pocock) Dybkjær. **H.** *Anulispora* sp. **I.** *Cycadopites follicularis* Wilson & Webster. **J.** *Perinopollenites elatoides* Couper. **K.** *Platysaccus* sp. **L.** *Monosulcites* sp. **M, N.** *Classopollis* spp. **O.** *Alisporites robustus* Nilsson. **P.** Tetrad *Classopollis* sp.

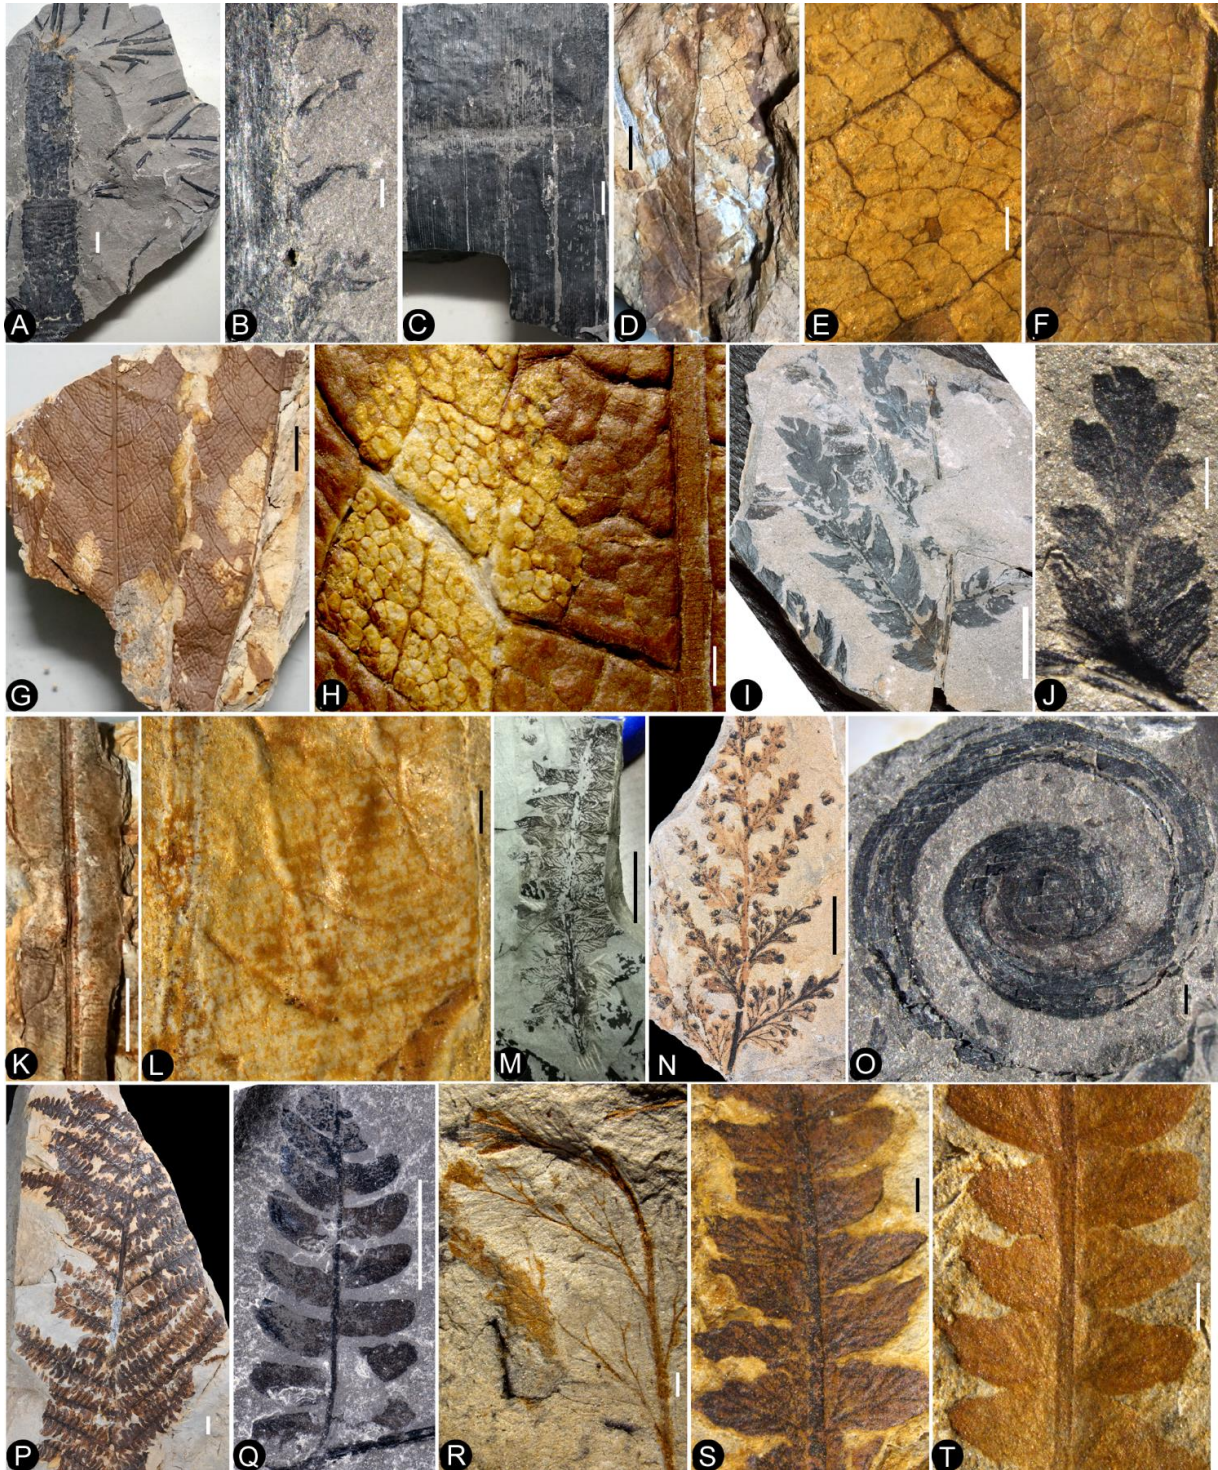

**Figure S3 Fossil plants associated with *Nanjinganthus*. Bar = 1 mm except otherwise annotated.**

**A.** *Neocalamites horridus*. PB22234. Bar = 1 cm. **B.** Detailed view of the prickles on the stem surface of *Neocalamites horridus*. **C.** *Neocalamites*. PB22235. Bar = 1 cm. **D.** *Clathropteris meniscioides*. PB22245. Bar = 1 cm. **E.** Detailed view of the 4-order reticulate venation of *Clathropteris meniscioides*, enlarged from Fig. S3d. PB22245. **F.** Reticulate venation of *Clathropteris platyphylla*. PB22232. **G.** Two leaves of *Clathropteris meniscioides*. PB22233. Bar = 1 cm. **H.** Detailed view of the 4-order reticulate venation, enlarged from Fig. S3g. **I.** *Cladophlebis*. PB22214. Bar = 1 cm. **J.** *Coniopteris*. PB22244. **K.** *Nilssoniopteris vittata* with a robust midrib. PB22238. Bar = 1 cm. **L.** Detailed view of the smooth margin and lateral veins branching off from the midrib, enlarged from Fig. S3k. PB22238. **M.** *Cladophlebis*. PB22251. Bar = 1 cm. **N.** ?Hymenophyllaceae. PB22213. Bar = 5 mm. **O.** *Spiropteris*. PB22239. **P.** *Cladophlebis*. PB22219. Bar = 1 cm. **Q.** *Cladophlebis*. PB22217. Bar = 1 cm. **R.** *Raphaelia*. PB22233. **S.** *Otozamites*. PB22248B. **T.** *Otozamites*. PB22248B.

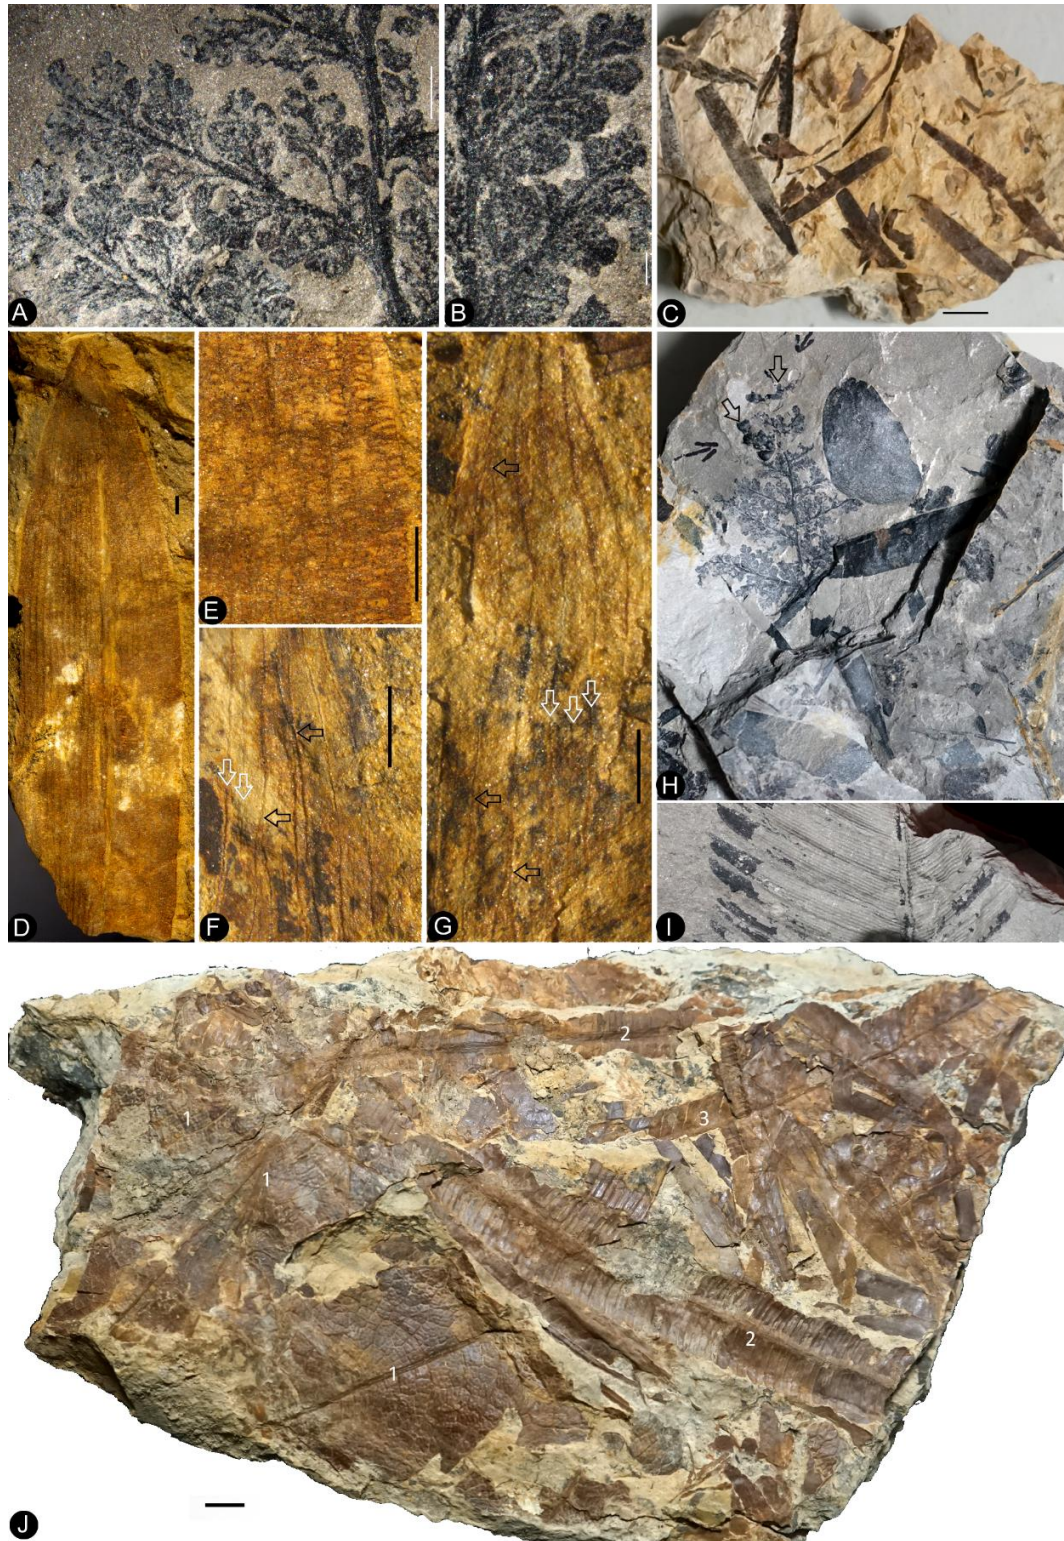

**Figure S4 Fossil plants associated with *Nanjinganthus*. Bar = 1 mm except otherwise annotated.**

**A.** Pinnae of *Coniopteris szeiana*, enlarged from Fig. S4h. PB22243. Bar = 2 mm. **B.** Detailed view of the pinnae of *Coniopteris szeiana*, enlarged from Fig. S4a. **C.** Leaves of *Desmiophyllum* on a slab. PB22231. Bar = 1 cm. **D.** A leaf of *Ferganiella* with midrib and parallel veins. PB22245. **E.** Detailed view of the parallel veins of the leaf in Fig. S4d. **F.** One of the leaves with at least two orders of longitudinal veins (white arrows) and occasional branching (black arrows), enlarged from Fig. S4g. **G.** A leaf closely associated with *Nanjinganthus* with parallel veins (white arrows) and occasional branching (black arrows). PB22241. **H.** Frond of *Coniopteris szeiana* associated with two *Nanjinganthus* (arrows). PB22243. Bar = 1 cm. **I.** *Ptilophyllum* showing pinnae with parallel venation. Bar = 1 cm. **J.** A slab loaded with fossils of *Clathropteris meniscioides* (1), *Nilssonia parabrevis* (2), and *Ptilophyllum contiguum* (3). PB22237. Bar = 1 cm.

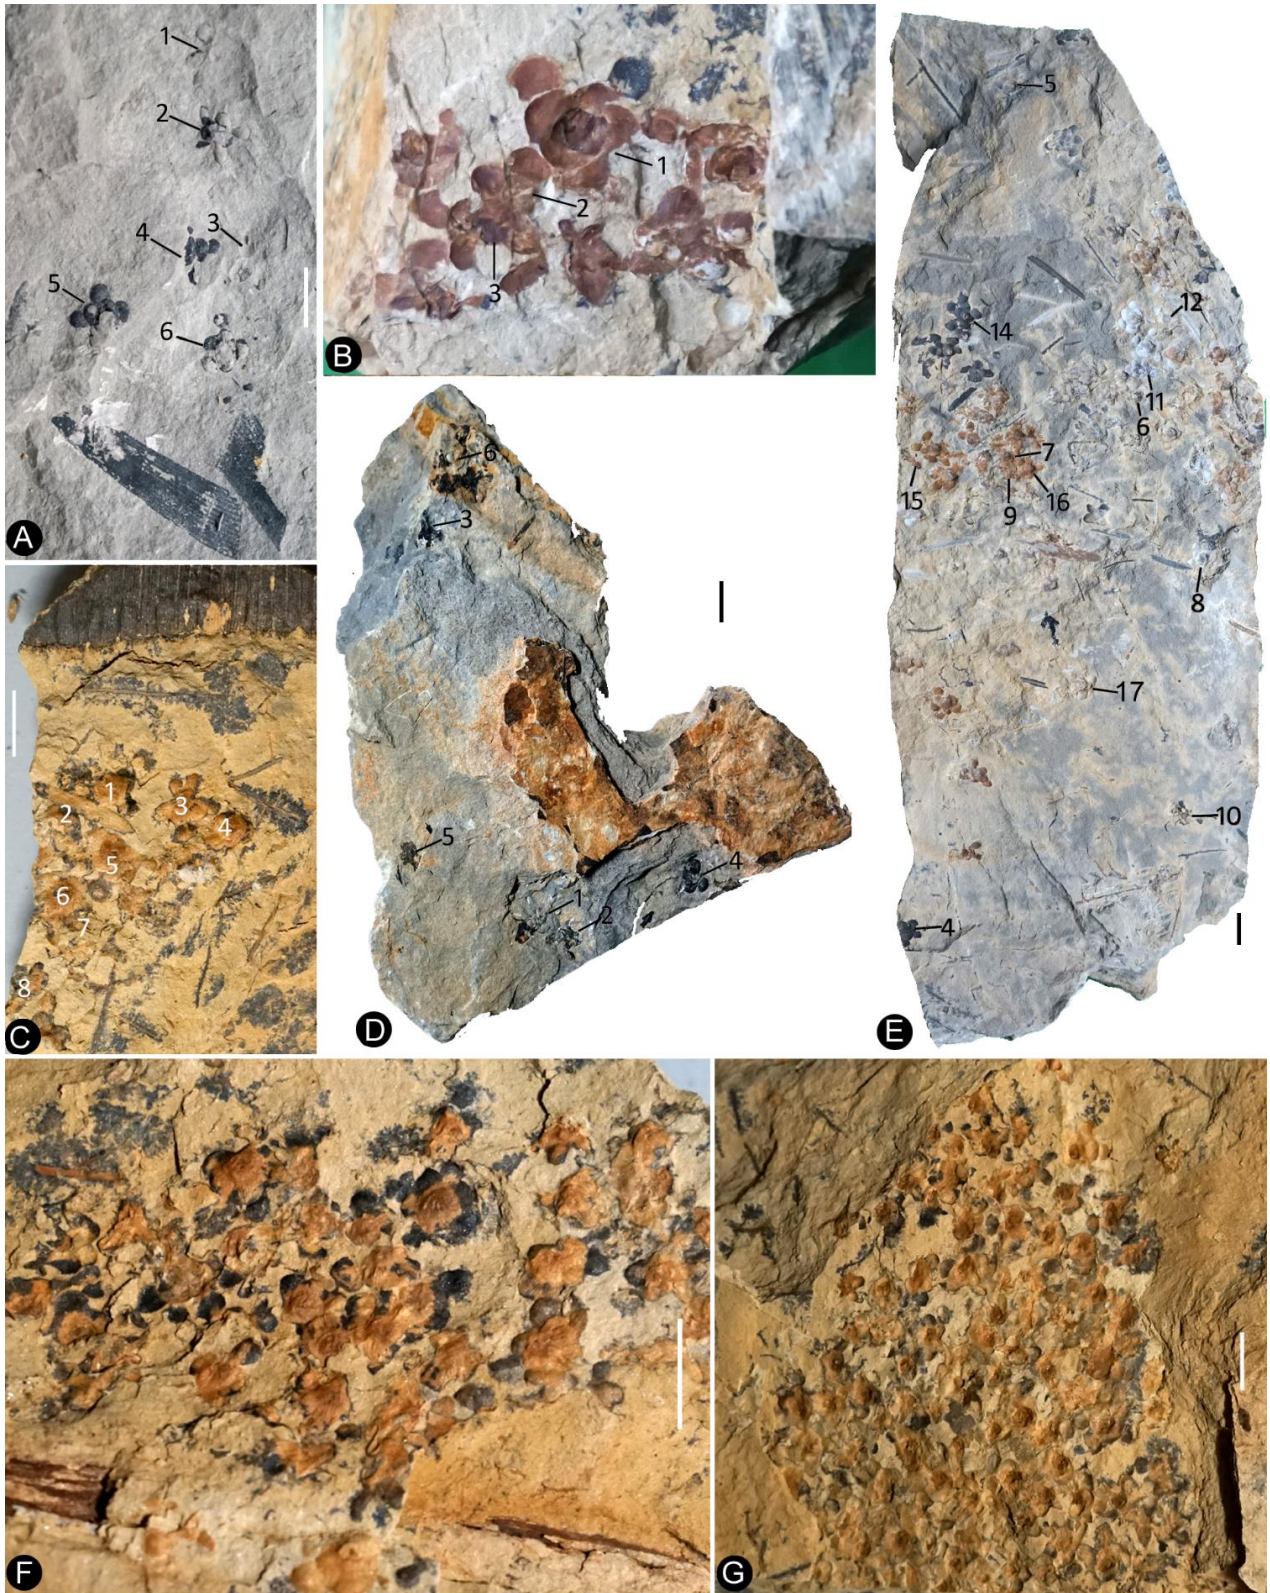

**Figure S5** Siltstone slabs bearing *Nanjinganthus*. All bars are 1 cm long.

**A.** Six *Nanjinganthus* (1-6) on the same slab, and their associated triangular leaflet with parallel venation. PB22227. **B.** Several *Nanjinganthus* (1-3) on the same slab. 1-3 are shown in detail in Figs. 1f and 3d, e. PB22226. **C.** Several *Nanjinganthus* (1-8) on the same slab and the associated *Nilssonia parabrevis* (top). PB22220. **D.** Several *Nanjinganthus* (1-6) on the same slab. 1-3 are shown in detail in other figures. PB22224. **E.** Many *Nanjinganthus* on the same slab. The numbered flowers are shown in detail in other figures. PB22222a. **F.** A slab with numerous *Nanjinganthus*. PB22221. **G.** A slab almost completely covered with *Nanjinganthus*. PB22228.



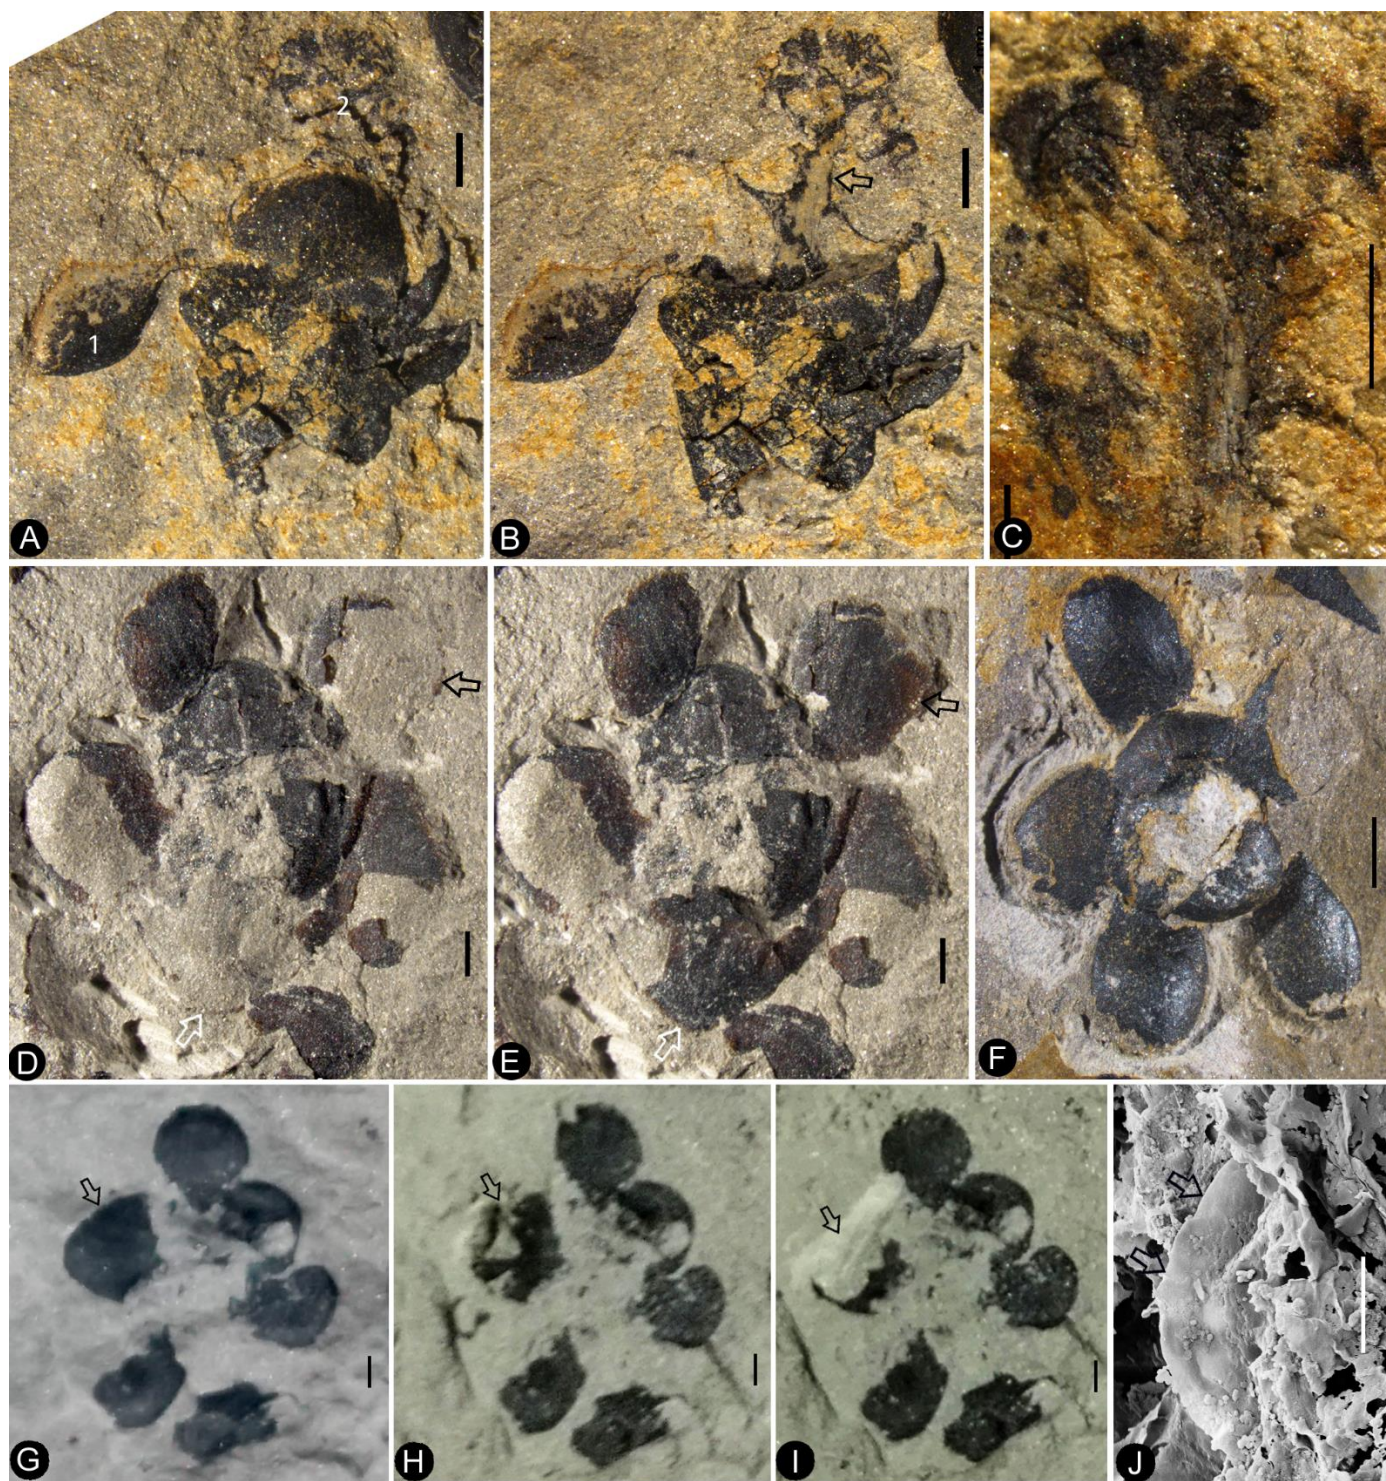

**Figure S6 Individuals of *Nanjinganthus*. Bar = 1 mm except otherwise annotated.**

A. Flower 2 in Fig. S5d, showing the petal (1) and style (2) still embedded in the sediments. B. The same flower as in Fig. S6a, after dégagement, showing the exposed dendroid style (arrow). C. A style with lateral branches. PB22222a. D-E. The same flower after and before the organic material of the sepals (white arrows) and petals (black arrows) were removed for cuticle analysis. F. Bottom view of a flower before processing. Internal details are shown in Figs. 1e, j. PB22278. G-I. Serial images showing the position (arrows) of the possible stamen shown in Fig. 4i. This is Flower 4 in Fig. 1b. PB22223. J. A possible pollen grain half-embedded in the stamen shown in Fig. 4i. PB22223. Bar = 10 μm.

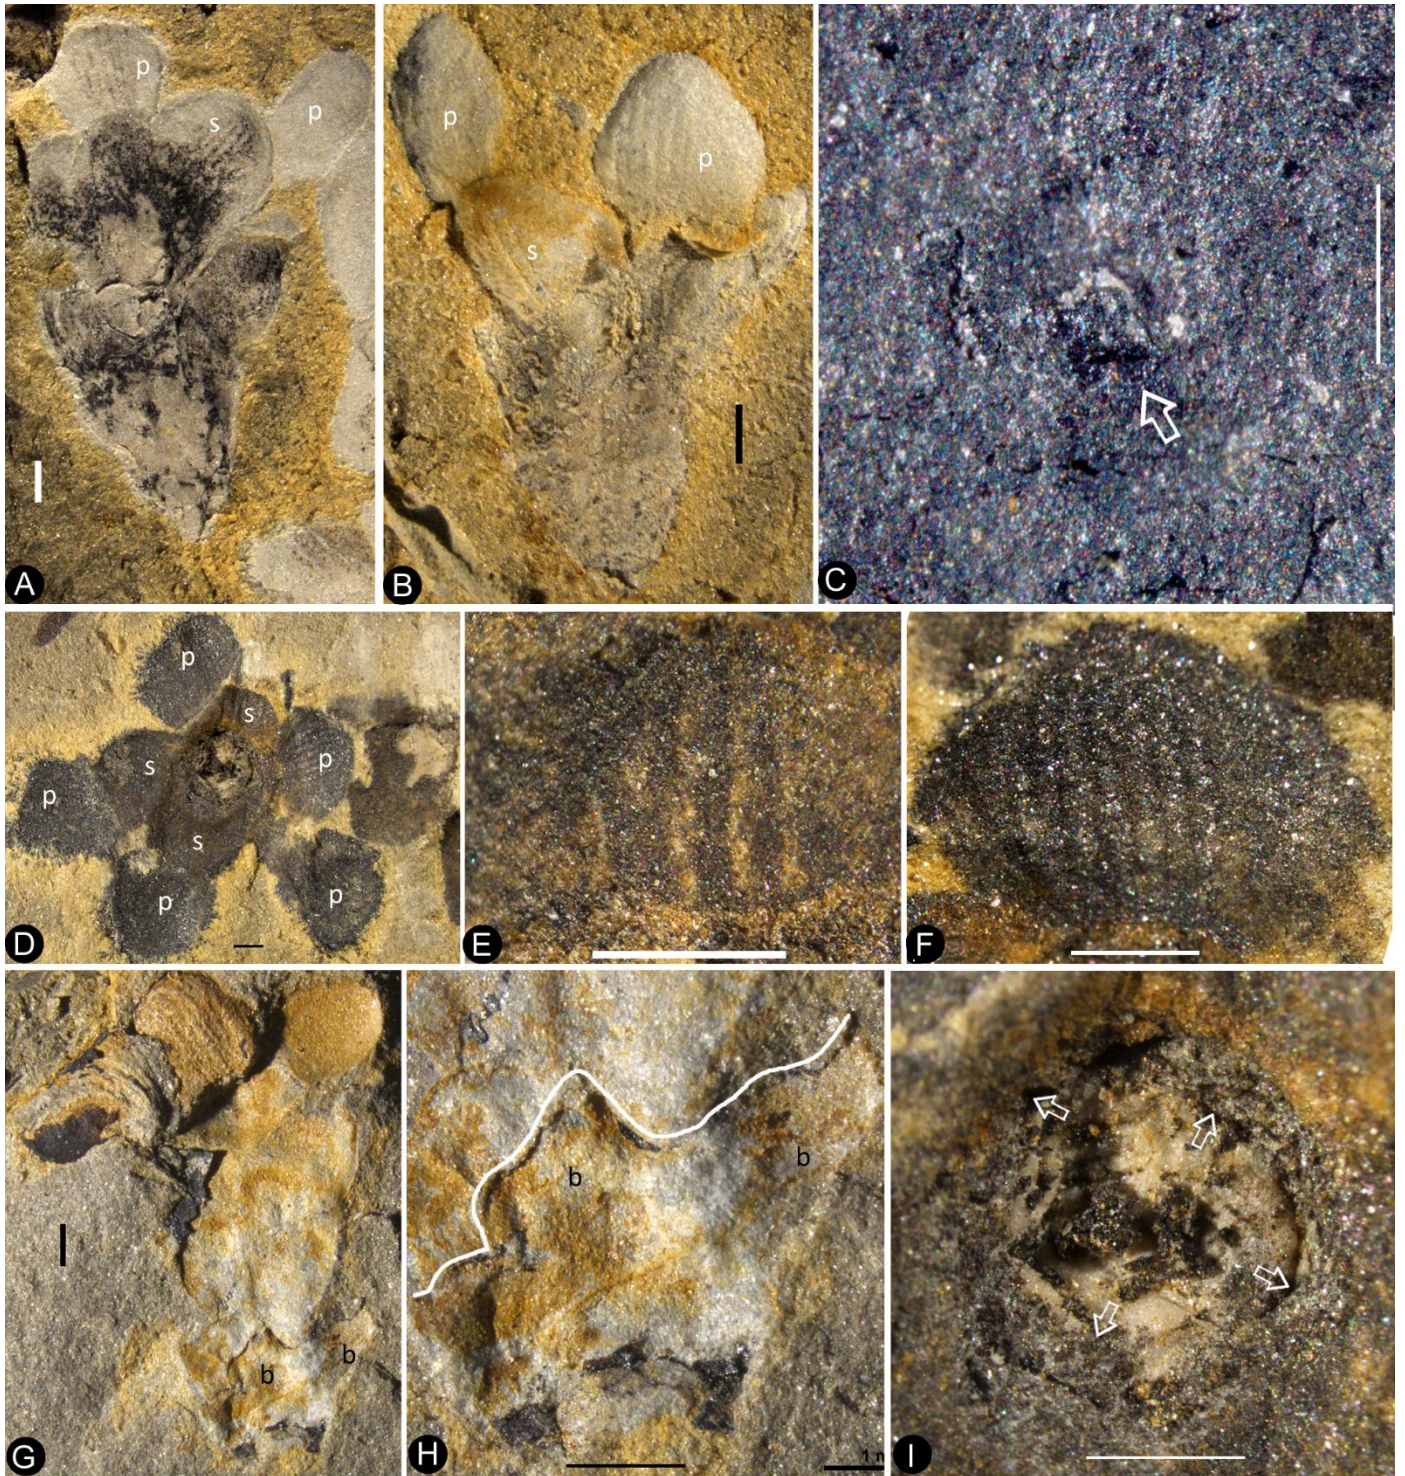

**Figure S7** *Nanjinganthus* preserved in various orientations and states. Bar = 1 mm except otherwise annotated.

**A.** An oblique longitudinally split flower (No. 11 in Fig. S5e) with sepals (s) and petals (p). **B.** A longitudinally split flower (No. 12 in Fig. S5e) with sepals (s) and petals (p). **C.** Integral surface of an ovarian roof with a stub (arrow) left by a fallen-off style, from the flower in Fig. S8h. Bar = 0.5 mm. **D.** Bottom view of a flower (No. 14 in Fig. S5e) with three sepals (s) and five petals (p). **E.** One of the sepals in Fig. S7d, showing longitudinal ribs. **F.** One of the petals in Fig. S7d, showing longitudinal ribs. **G.** Side view of a flower, showing connate bracts (b) at the bottom. PB22229. **H.** Detailed view of the connate bracts (b) in Fig. S7g. Note the outline (white line) of the fused bracts. **I.** The locule surrounded by the ovary/receptacle wall (arrows) of the flower shown in Fig. S7d.

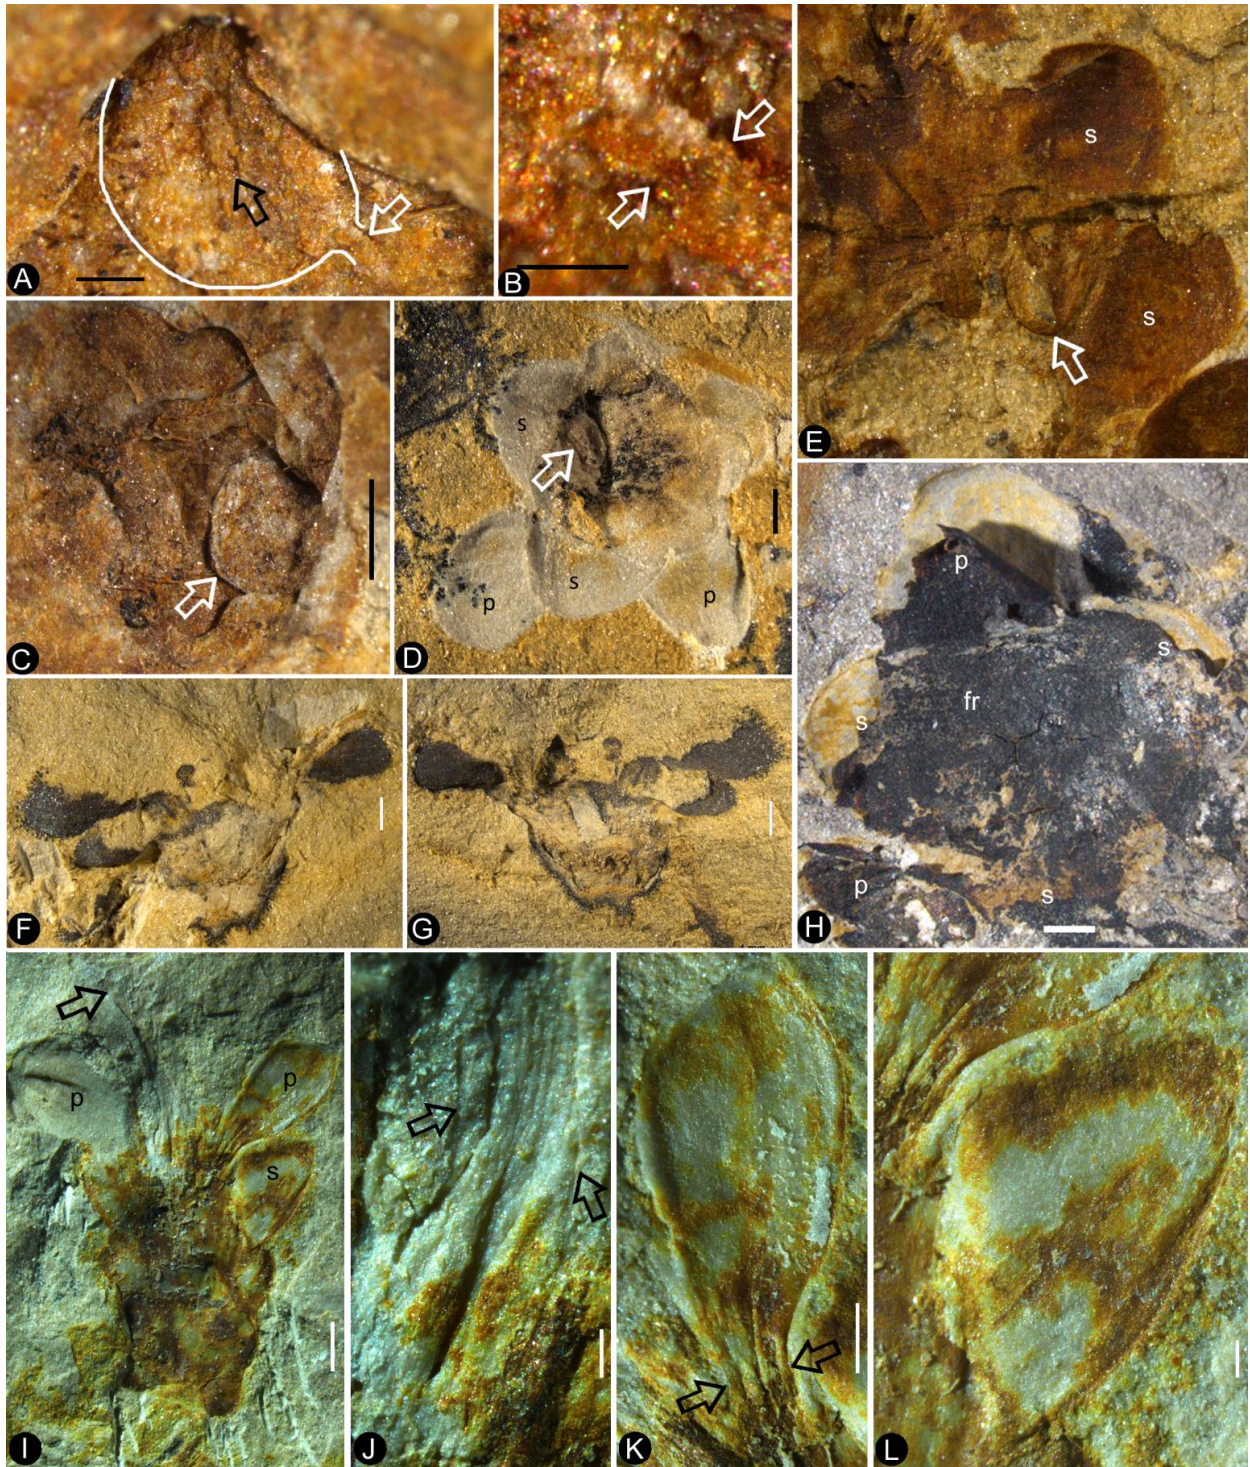

**Figure S8** *In situ* seeds and flowers. Bar = 1 mm except otherwise annotated.

**A.** An ovule (outlined) inside the ovary of Flower 16 in Fig. S5e. Note the oboval micropyle (black arrow) and funiculus (white arrow). Bar = 0.2 mm. **B.** Detailed view of the funiculus (between the arrows) of the ovule in Fig. S8a. Bar = 0.1 mm. **C.** An ovule/seed (detailed in Fig. 3i) inside the ovary of Flower 7 in Fig. S5e. **D.** An ovule (arrow) inside the ovary of Flower 8 in Fig. S5e. **E.** An ovule (arrow, detailed in Fig. 3d-e) inside the receptacle in Flower 2 in Fig. S5b. **F, G.** Two facing parts of the same flower (No. 10 in Fig. S5e). Note that the dendroid style is not visible in Fig. S8g but is visible in Fig. 3a after dégageant. **H.** Top view of a flower with organic-preserved sepals (s), petals (p) and ovarian roof (fr), which is detailed in Fig. S7c. PB22279. **I.** Side view of a longitudinally split flower with sepals (s), petals (p) and partially preserved style (arrow). PB22489. Bar = 1 mm. **J.** Detailed view of basal portion of the style (between arrows) arrowed in Fig. S8i. Bar = 0.2 mm. **K.** Detailed view of the right petal with narrowing base (between arrows) in Fig. S8i. Bar = 0.5 mm. **L.** Detailed view of a sepal in Fig. S8i. Bar = 0.2 mm.

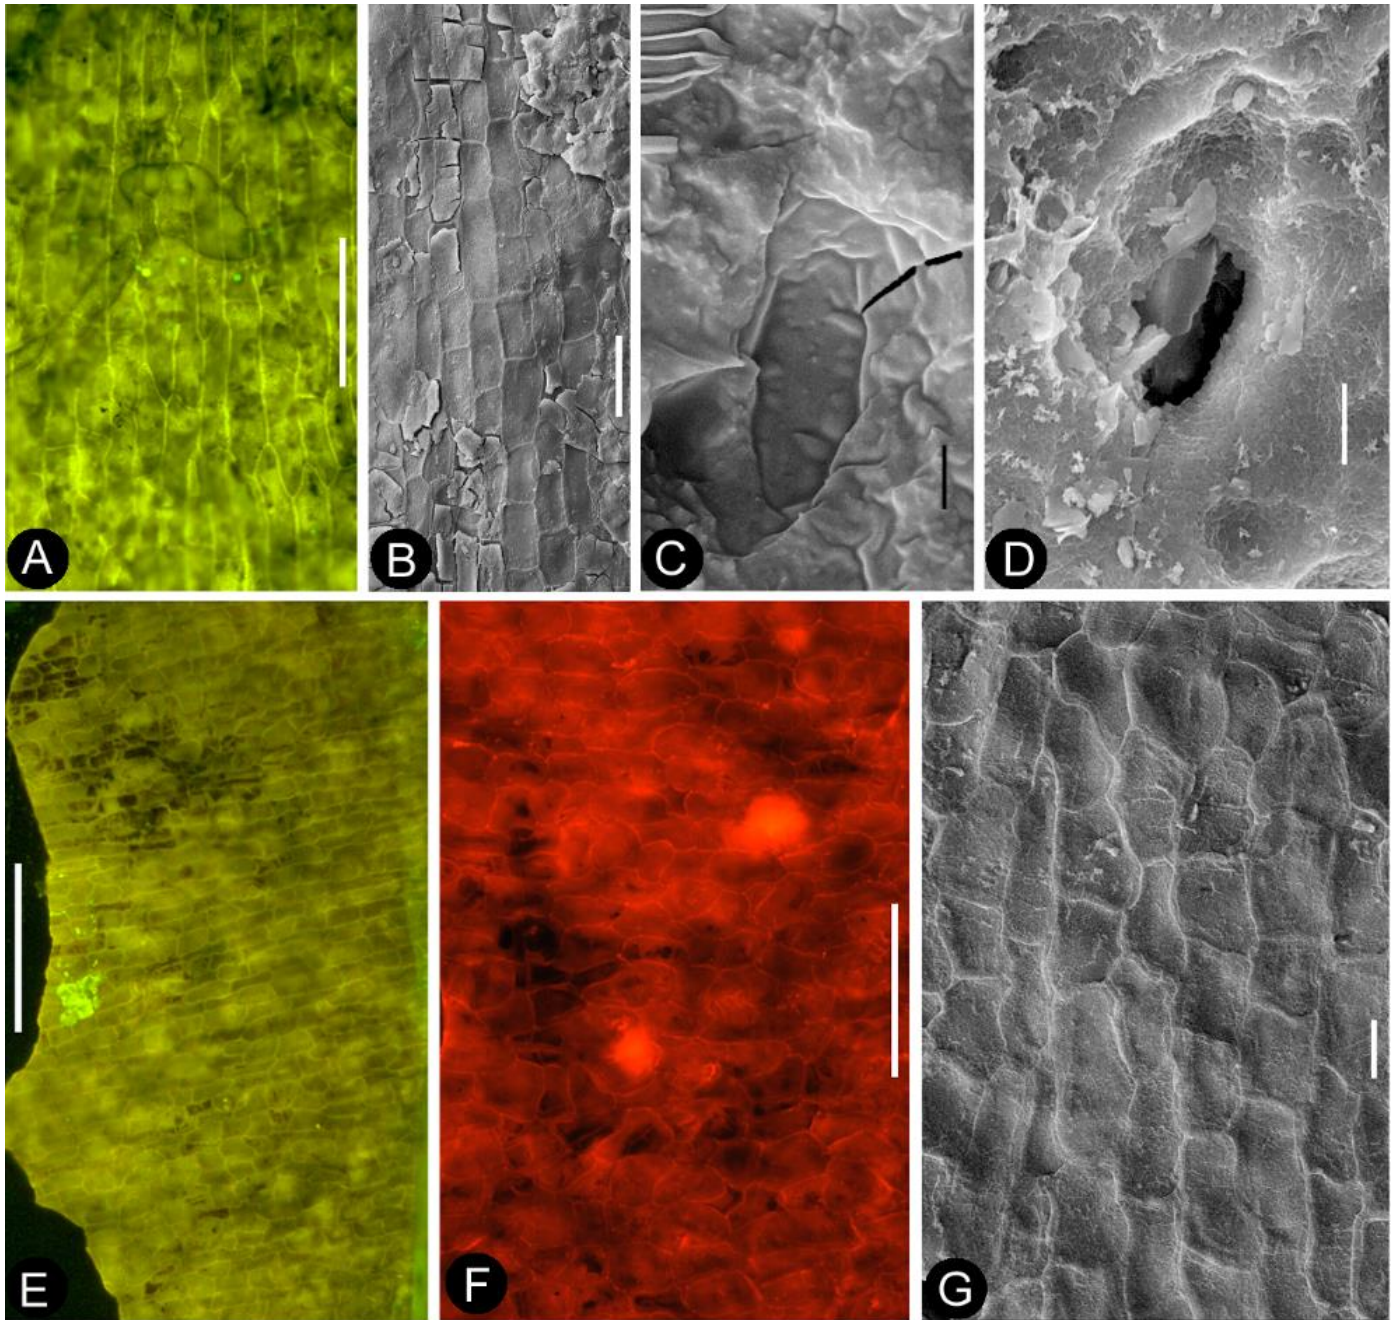

**Figure S9 Cuticular details of *Nanjinganthus*. Fluorescence light microscopy except otherwise annotated.**

**A.** Elongated epidermal cells in longitudinal files in the middle portion of the petal in Fig. 4b. Bar = 0.1 mm. **B.** Elongated epidermal cells on the rib of the petal in Fig. 4b. SEM. Bar = 50  $\mu$ m. **C.** A possible stoma on the petal shown in Fig. 4b. SEM. Bar = 2  $\mu$ m. **D.** Stoma on the bract of the flower in Fig. 1h. SEM. Bar = 5  $\mu$ m. **E.** Elongated epidermal cells in files on the sepal of Flower 2 in Fig. 1b. Bar = 0.2 mm. **F.** Isodiametric epidermal cells on the sepal of Flower 2 in Fig. 1b. Bar = 0.1 mm. **G.** Isodiametric epidermal cells on the sepal of Flower 2 in Fig. 1b. SEM. Bar = 20  $\mu$ m.

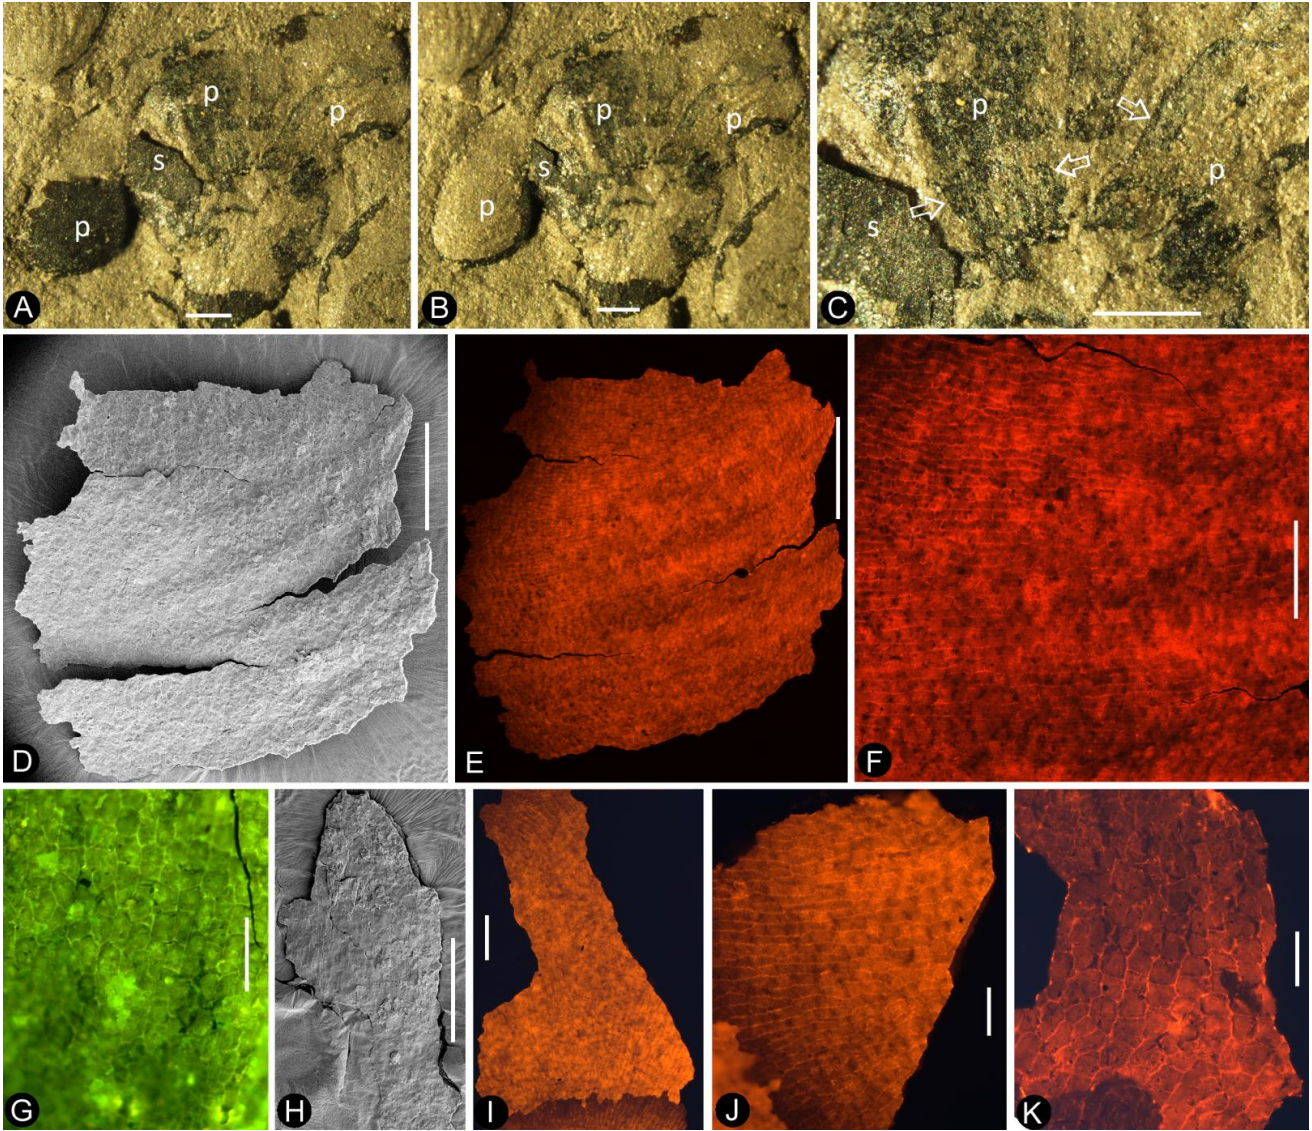

**Figure S10** *Nanjinganthus*, petal and details.

**A.** Side view of Flower 3 in Fig. 1b, showing the arrangement of the petals (p) and sepal (s). Bar = 1 mm. **B.** The same flower as in Fig. S10a. Note that some of the organic material of the petal has been removed for detailed observation. Bar = 1 mm. **C.** Margins (arrows) of the petal (p) with cuneate pedicel and their relationship to the sepal (s). Bar = 1 mm. **D.** The petal removed from Fig. S10a. SEM. Bar = 0.5 mm. **E.** Cellular details of the petal in Fig. S10d. Fluorescence light microscopy. Bar = 0.5 mm. **F.** Elongated epidermal cells arranged in files, enlarged from Fig. S10e. Fluorescence light microscopy. Bar = 0.2 mm. **G.** Isodiametric epidermal cells in the wing portion of the petal in Fig. S10e. Fluorescence light microscopy. Bar = 0.1 mm. **H.** A fragment of the sepal seen in Fig. S10a. SEM. Bar = 0.5 mm. **I.** Cellular details of the sepal in Fig. S10h. Fluorescence light microscopy. Bar = 0.2 mm. **J.** Elongated epidermal cells arranged in files on the sepal in Fig. S10i. Fluorescence light microscopy. Bar = 0.1 mm. **K.** Isodiametric epidermal cells on the wing of the sepal in Fig. S10a. Fluorescence light microscopy. Bar = 0.1 mm.

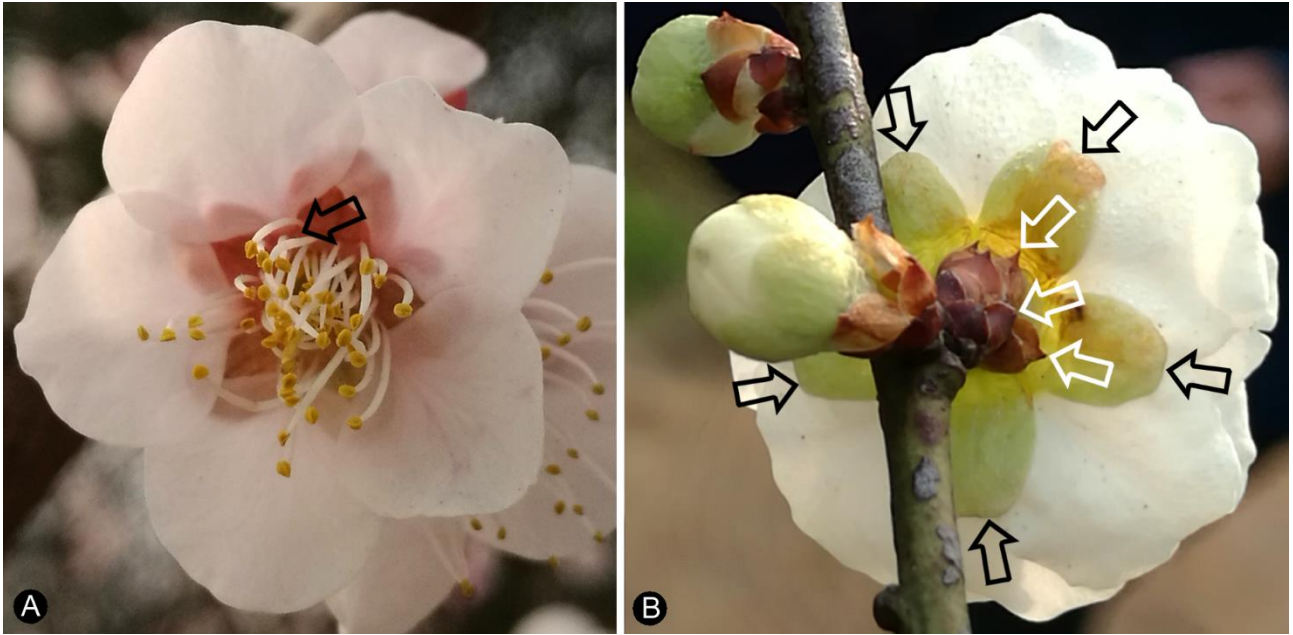

**Figure S11 Flowers of a living angiosperm and its details.**

**A.** Top view showing the white petals with narrowing bases (arrow) and green sepals in the background. **B.** Scales (white arrows), sepals (black arrows), and white petals.

**Table S1 Number of flowers on each *Nanjinganthus* specimen.**

| Number of flowers | Specimen number |
|-------------------|-----------------|
| 39                | PB22221         |
| 82                | PB22222         |
| 27                | PB22223         |
| 5                 | PB22224         |
| 3                 | PB22225         |
| 10                | PB22226         |
| 6                 | PB22227         |
| 80                | PB22228         |
| 1                 | PB22229         |
| 1                 | PB22236         |
| 4                 | PB22238         |
| 1                 | PB22241         |
| 1                 | PB22242         |
| 2                 | PB22243         |
| 1                 | PB22245         |
| 2                 | PB22246         |
| 1                 | PB22247         |
| 1                 | PB22256         |
| 1                 | PB22257         |
| 1                 | PB22258         |
| 1                 | PB22259         |
| 1                 | PB22260         |
| 1                 | PB22278         |
| 4                 | PB22279         |
| 4                 | PB22280         |
| 1                 | PB22281         |
| 1                 | PB22282         |
| 2                 | PB22489         |

**Table S2 Summary of zircon LA-ICP-MS U-Pb data for fossiliferous layers samples of the South Xiangshang Formation.**

| Spot      | Pb<br>(ppm) | U    | Th/U  | Isotopic ratios                      |      |                                     |      |                                     |      | Ages(Ma)                            |    |                                     |    | Concordance |                                     |        |
|-----------|-------------|------|-------|--------------------------------------|------|-------------------------------------|------|-------------------------------------|------|-------------------------------------|----|-------------------------------------|----|-------------|-------------------------------------|--------|
|           |             |      |       | <sup>207</sup> Pb/ <sup>206</sup> Pb | en%  | <sup>207</sup> Pb/ <sup>235</sup> U | en%  | <sup>206</sup> Pb/ <sup>238</sup> U | en%  | <sup>207</sup> Pb/ <sup>235</sup> U | 1σ | <sup>206</sup> Pb/ <sup>238</sup> U | 1σ |             | <sup>206</sup> Pb/ <sup>238</sup> U | 1σ     |
| 16NJ09.1  | 42          | 519  | 0.866 | 0.0982                               | 1.54 | 1.0345                              | 1.63 | 0.0764                              | 1.04 | 721                                 | 12 | 475                                 | 5  | 1591        | 29                                  | 48.02% |
| 16NJ09.2  | 2           | 22   | 0.86  | 0.0961                               | 7.80 | 1.3940                              | 7.68 | 0.1052                              | 1.39 | 886                                 | 68 | 645                                 | 9  | 1550        | 146                                 | 62.51% |
| 16NJ09.4  | 3           | 37   | 0.905 | 0.1255                               | 7.13 | 1.1696                              | 7.21 | 0.0676                              | 1.75 | 786                                 | 57 | 422                                 | 7  | 2035        | 126                                 | 13.54% |
| 16NJ09.5  | 58          | 233  | 0.827 | 0.1241                               | 1.51 | 3.9634                              | 1.61 | 0.2316                              | 0.99 | 1627                                | 26 | 1343                                | 13 | 2016        | 27                                  | 78.85% |
| 16NJ09.6  | 5           | 88   | 2.32  | 0.0529                               | 6.68 | 0.3087                              | 6.82 | 0.0423                              | 1.15 | 273                                 | 19 | 267                                 | 3  | 324         | 152                                 | 97.79% |
| 16NJ09.7  | 6           | 122  | 1.099 | 0.0930                               | 3.61 | 0.5546                              | 3.64 | 0.0433                              | 1.14 | 448                                 | 16 | 273                                 | 3  | 1487        | 68                                  | 35.95% |
| 16NJ09.8  | 137         | 312  | 0.493 | 0.1543                               | 1.54 | 8.2808                              | 1.65 | 0.3891                              | 0.99 | 2262                                | 37 | 2119                                | 21 | 2395        | 26                                  | 93.23% |
| 16NJ09.10 | 12          | 234  | 1.14  | 0.0769                               | 3.17 | 0.4537                              | 3.29 | 0.0428                              | 1.04 | 380                                 | 12 | 270                                 | 3  | 1119        | 63                                  | 59.34% |
| 16NJ09.11 | 16          | 198  | 0.662 | 0.0786                               | 2.20 | 0.7851                              | 2.21 | 0.0724                              | 1.00 | 588                                 | 13 | 451                                 | 4  | 1163        | 44                                  | 69.46% |
| 16NJ09.12 | 166         | 305  | 0.348 | 0.2010                               | 1.51 | 13.7308                             | 1.65 | 0.4955                              | 1.02 | 2731                                | 45 | 2594                                | 27 | 2834        | 25                                  | 94.72% |
| 16NJ09.13 | 57          | 874  | 0.647 | 0.1002                               | 1.55 | 0.8013                              | 1.63 | 0.0580                              | 0.99 | 598                                 | 10 | 363                                 | 4  | 1628        | 29                                  | 35.55% |
| 16NJ09.14 | 107         | 1038 | 0.892 | 0.1103                               | 1.56 | 1.4457                              | 1.62 | 0.0951                              | 1.05 | 908                                 | 15 | 585                                 | 6  | 1804        | 28                                  | 44.90% |
| 16NJ09.16 | 62          | 748  | 0.672 | 0.0575                               | 1.61 | 0.6097                              | 1.71 | 0.0770                              | 0.99 | 483                                 | 8  | 478                                 | 5  | 509         | 35                                  | 98.88% |
| 16NJ09.19 | 7           | 155  | 0.651 | 0.0531                               | 3.81 | 0.3120                              | 3.84 | 0.0426                              | 1.03 | 276                                 | 11 | 269                                 | 3  | 334         | 86                                  | 97.45% |
| 16NJ09.20 | 58          | 804  | 0.458 | 0.0749                               | 1.61 | 0.7146                              | 1.67 | 0.0692                              | 0.99 | 547                                 | 9  | 431                                 | 4  | 1066        | 32                                  | 73.03% |
| 16NJ09.21 | 20          | 136  | 1.223 | 0.0658                               | 2.01 | 1.1598                              | 2.12 | 0.1279                              | 1.06 | 782                                 | 17 | 776                                 | 8  | 799         | 42                                  | 99.24% |
| 16NJ09.22 | 73          | 232  | 1.297 | 0.1110                               | 1.53 | 4.2758                              | 1.63 | 0.2794                              | 0.99 | 1689                                | 27 | 1588                                | 16 | 1816        | 28                                  | 93.67% |
| 16NJ09.24 | 24          | 194  | 0.828 | 0.0825                               | 1.76 | 1.2947                              | 1.93 | 0.1139                              | 1.12 | 843                                 | 16 | 695                                 | 8  | 1257        | 34                                  | 78.67% |
| 16NJ09.25 | 28          | 345  | 0.528 | 0.0583                               | 1.85 | 0.6360                              | 1.96 | 0.0791                              | 1.01 | 500                                 | 10 | 491                                 | 5  | 542         | 40                                  | 98.14% |
| 16NJ09.26 | 50          | 631  | 0.998 | 0.0561                               | 1.66 | 0.5357                              | 1.77 | 0.0693                              | 0.99 | 436                                 | 8  | 432                                 | 4  | 455         | 37                                  | 99.15% |
| 16NJ09.27 | 59          | 249  | 1.02  | 0.1352                               | 1.51 | 3.7920                              | 1.62 | 0.2034                              | 0.99 | 1591                                | 26 | 1194                                | 12 | 2167        | 26                                  | 66.69% |
| 16NJ09.28 | 36          | 163  | 0.761 | 0.0773                               | 1.61 | 2.0782                              | 1.72 | 0.1950                              | 1.01 | 1142                                | 20 | 1148                                | 12 | 1129        | 32                                  | 99.43% |
| 16NJ09.29 | 50          | 799  | 0.455 | 0.1016                               | 1.55 | 0.8086                              | 1.65 | 0.0577                              | 1.02 | 602                                 | 10 | 362                                 | 4  | 1654        | 29                                  | 33.61% |

|           |     |     |       |        |      |         |      |        |      |      |    |      |    |      |    |        |
|-----------|-----|-----|-------|--------|------|---------|------|--------|------|------|----|------|----|------|----|--------|
| 16NJ09.30 | 15  | 290 | 0.988 | 0.0738 | 2.67 | 0.4387  | 2.93 | 0.0431 | 1.04 | 369  | 11 | 272  | 3  | 1036 | 54 | 64.28% |
| 16NJ09.32 | 101 | 719 | 0.297 | 0.0789 | 1.56 | 1.5277  | 1.64 | 0.1404 | 1.10 | 942  | 15 | 847  | 9  | 1169 | 31 | 88.85% |
| 16NJ17.1  | 0   | 2   | 8.658 | 0.0712 | 2.16 | 1.7990  | 2.44 | 0.1832 | 1.03 | 1045 | 25 | 1084 | 11 | 964  | 21 | 96.37% |
| 16NJ17.2  | 0   | 2   | 2.388 | 0.0803 | 2.97 | 1.0193  | 3.42 | 0.0917 | 1.17 | 714  | 24 | 565  | 7  | 1205 | 36 | 73.78% |
| 16NJ17.3  | 0   | 1   | 2.03  | 0.0730 | 3.49 | 1.3998  | 3.62 | 0.1392 | 0.86 | 889  | 32 | 840  | 7  | 1014 | 35 | 94.17% |
| 16NJ17.4  | 1   | 5   | 1.006 | 0.1122 | 2.52 | 1.5091  | 3.17 | 0.0967 | 1.20 | 934  | 30 | 595  | 7  | 1835 | 46 | 42.96% |
| 16NJ17.5  | 3   | 12  | 0.221 | 0.1323 | 2.18 | 5.0590  | 2.67 | 0.2773 | 1.42 | 1829 | 49 | 1578 | 22 | 2129 | 46 | 84.06% |
| 16NJ17.6  | 1   | 6   | 0.072 | 0.1057 | 2.62 | 1.7656  | 2.99 | 0.1207 | 0.73 | 1033 | 31 | 735  | 5  | 1726 | 45 | 59.43% |
| 16NJ17.7  | 452 | 233 | 0.4   | 0.1629 | 2.30 | 9.6964  | 2.43 | 0.4321 | 0.54 | 2406 | 59 | 2315 | 12 | 2486 | 57 | 96.07% |
| 16NJ17.8  | 196 | 102 | 0.848 | 0.1628 | 3.04 | 3.7322  | 3.95 | 0.1636 | 1.44 | 1578 | 62 | 977  | 14 | 2485 | 76 | 38.40% |
| 16NJ17.9  | 6   | 13  | 3.71  | 0.1662 | 2.39 | 9.8653  | 2.57 | 0.4309 | 0.72 | 2422 | 62 | 2310 | 17 | 2520 | 60 | 95.13% |
| 16NJ17.10 | 1   | 6   | 1.237 | 0.0828 | 2.61 | 1.6445  | 3.03 | 0.1434 | 0.90 | 987  | 30 | 864  | 8  | 1265 | 33 | 85.73% |
| 16NJ17.11 | 0   | 3   | 4.197 | 0.0673 | 2.60 | 0.4644  | 3.18 | 0.0497 | 1.03 | 387  | 12 | 313  | 3  | 847  | 22 | 76.10% |
| 16NJ17.12 | 0   | 3   | 1.215 | 0.0907 | 3.26 | 1.8033  | 4.23 | 0.1417 | 1.46 | 1047 | 44 | 854  | 12 | 1439 | 47 | 77.49% |
| 16NJ17.14 | 0   | 2   | 1.571 | 0.0672 | 3.50 | 0.4204  | 3.68 | 0.0453 | 0.59 | 356  | 13 | 286  | 2  | 844  | 30 | 75.24% |
| 16NJ17.15 | 4   | 9   | 3.65  | 0.1881 | 2.73 | 12.1051 | 3.12 | 0.4661 | 1.29 | 2613 | 82 | 2466 | 32 | 2725 | 75 | 94.07% |
| 16NJ17.16 | 0   | 3   | 1.471 | 0.0897 | 3.20 | 1.7950  | 3.44 | 0.1447 | 0.73 | 1044 | 36 | 871  | 6  | 1419 | 45 | 80.21% |
| 16NJ17.17 | 1   | 5   | 2.129 | 0.1019 | 2.97 | 3.2330  | 3.12 | 0.2300 | 0.54 | 1465 | 46 | 1334 | 7  | 1658 | 49 | 90.19% |
| 16NJ17.18 | 5   | 15  | 4.975 | 0.1168 | 2.75 | 5.1458  | 2.98 | 0.3191 | 0.87 | 1844 | 55 | 1786 | 16 | 1908 | 52 | 96.74% |
| 16NJ17.19 | 2   | 5   | 5.775 | 0.1118 | 2.60 | 4.9003  | 2.76 | 0.3179 | 0.64 | 1802 | 50 | 1780 | 11 | 1828 | 48 | 98.72% |
| 16NJ17.20 | 2   | 7   | 10.43 | 0.1221 | 2.48 | 4.9544  | 2.68 | 0.2942 | 0.72 | 1812 | 49 | 1662 | 12 | 1987 | 49 | 91.03% |
| 16NJ17.21 | 3   | 9   | 2.782 | 0.1117 | 2.40 | 5.3689  | 2.58 | 0.3487 | 0.65 | 1880 | 48 | 1928 | 13 | 1827 | 44 | 97.49% |
| 16NJ17.22 | 0   | 3   | 1.563 | 0.0767 | 3.00 | 1.3475  | 3.47 | 0.1267 | 0.89 | 866  | 30 | 769  | 7  | 1112 | 33 | 87.35% |
| 16NJ17.23 | 1   | 7   | 2.336 | 0.0764 | 2.40 | 1.6207  | 2.59 | 0.1538 | 0.58 | 978  | 25 | 922  | 5  | 1106 | 27 | 93.94% |
| 16NJ17.24 | 1   | 5   | 6.116 | 0.0768 | 2.39 | 1.2516  | 2.90 | 0.1182 | 1.39 | 824  | 24 | 720  | 10 | 1115 | 27 | 85.57% |
| 16NJ17.25 | 7   | 24  | 2.457 | 0.1407 | 2.36 | 5.7386  | 2.55 | 0.2961 | 0.68 | 1937 | 49 | 1672 | 11 | 2236 | 53 | 84.12% |
| 16NJ17.26 | 3   | 10  | 3.035 | 0.1130 | 2.28 | 4.9338  | 2.55 | 0.3169 | 0.96 | 1808 | 46 | 1774 | 17 | 1849 | 42 | 98.10% |
| 16NJ17.27 | 2   | 9   | 2.316 | 0.0956 | 2.24 | 2.9837  | 2.52 | 0.2261 | 0.79 | 1403 | 35 | 1314 | 10 | 1540 | 35 | 93.19% |
| 16NJ17.28 | 0   | 1   | 2.878 | 0.1004 | 3.05 | 1.9117  | 5.82 | 0.1338 | 3.85 | 1085 | 63 | 809  | 31 | 1631 | 50 | 65.94% |
| 16NJ17.29 | 0   | 2   | 1.794 | 0.0835 | 2.79 | 1.9537  | 3.76 | 0.1680 | 1.65 | 1100 | 41 | 1001 | 17 | 1280 | 36 | 90.14% |
| 16NJ17.31 | 7   | 20  | 1.833 | 0.1378 | 2.11 | 6.3608  | 2.33 | 0.3346 | 0.77 | 2027 | 47 | 1861 | 14 | 2200 | 46 | 91.08% |
| 16NJ17.32 | 4   | 8   | 4.552 | 0.1685 | 2.10 | 11.0648 | 2.24 | 0.4763 | 0.55 | 2529 | 57 | 2511 | 14 | 2543 | 53 | 99.31% |
| 16NJ17.34 | 2   | 7   | 2.996 | 0.0884 | 2.16 | 2.8030  | 2.30 | 0.2299 | 0.52 | 1356 | 31 | 1334 | 7  | 1392 | 30 | 98.34% |
| 16NJ17.35 | 4   | 10  | 1.65  | 0.1123 | 2.15 | 5.7354  | 2.40 | 0.3705 | 0.91 | 1937 | 46 | 2032 | 18 | 1837 | 39 | 95.33% |
| 16NJ17.36 | 2   | 7   | 3.382 | 0.1370 | 2.19 | 6.4169  | 2.32 | 0.3399 | 0.53 | 2035 | 47 | 1886 | 10 | 2190 | 48 | 92.12% |
| 16NJ17.37 | 0   | 2   | 1.564 | 0.0908 | 2.83 | 2.2141  | 3.43 | 0.1759 | 1.26 | 1186 | 41 | 1044 | 13 | 1443 | 41 | 86.48% |
| 16NJ17.38 | 0   | 4   | 2.009 | 0.0766 | 2.70 | 0.8340  | 3.09 | 0.0787 | 0.76 | 616  | 19 | 488  | 4  | 1110 | 30 | 73.89% |
| 16NJ17.39 | 7   | 13  | 1.709 | 0.1702 | 2.48 | 11.0912 | 2.65 | 0.4728 | 0.57 | 2531 | 67 | 2496 | 14 | 2560 | 63 | 98.60% |
| 16NJ17.40 | 2   | 10  | 9.706 | 0.1131 | 2.63 | 3.7761  | 2.87 | 0.2423 | 0.82 | 1588 | 46 | 1399 | 12 | 1849 | 49 | 86.48% |
| 16NJ17.41 | 2   | 6   | 5.233 | 0.1108 | 2.60 | 5.1871  | 2.75 | 0.3398 | 0.56 | 1851 | 51 | 1886 | 11 | 1813 | 47 | 98.13% |
| 16NJ17.42 | 0   | 2   | 45.9  | 0.0724 | 2.55 | 0.8759  | 2.72 | 0.0879 | 0.83 | 639  | 17 | 543  | 5  | 998  | 25 | 82.40% |
| 16NJ17.43 | 0   | 4   | 3.102 | 0.0820 | 2.90 | 0.5287  | 3.45 | 0.0464 | 1.04 | 431  | 15 | 293  | 3  | 1245 | 36 | 52.67% |
| 16NJ17.44 | 0   | 2   | 1.336 | 0.1360 | 2.92 | 1.9353  | 4.03 | 0.1017 | 1.93 | 1093 | 44 | 624  | 12 | 2177 | 63 | 24.80% |
| 16NJ17.45 | 11  | 23  | 1.064 | 0.1512 | 2.20 | 8.8030  | 2.35 | 0.4224 | 0.56 | 2318 | 54 | 2272 | 13 | 2360 | 52 | 97.96% |
| 16NJ17.46 | 1   | 3   | 4.937 | 0.1303 | 2.16 | 6.7052  | 2.37 | 0.3734 | 0.81 | 2073 | 49 | 2045 | 17 | 2102 | 45 | 98.64% |
| 16NJ17.48 | 0   | 2   | 0.299 | 0.0774 | 3.28 | 0.7370  | 3.40 | 0.0696 | 1.49 | 561  | 19 | 434  | 6  | 1131 | 37 | 70.69% |
| 16NJ17.49 | 2   | 8   | 0.231 | 0.0945 | 2.13 | 2.9850  | 2.29 | 0.2291 | 0.59 | 1404 | 32 | 1330 | 8  | 1517 | 32 | 94.44% |
| 16NJ17.50 | 1   | 4   | 0.737 | 0.0761 | 2.76 | 1.4112  | 3.45 | 0.1332 | 1.13 | 894  | 31 | 806  | 9  | 1099 | 30 | 89.13% |
| 16NJ17.51 | 1   | 10  | 0.848 | 0.0698 | 2.16 | 1.2866  | 2.35 | 0.1336 | 0.65 | 840  | 20 | 809  | 5  | 922  | 20 | 96.14% |
| 16NJ17.52 | 3   | 9   | 0.578 | 0.1185 | 2.07 | 5.8582  | 2.21 | 0.3586 | 0.56 | 1955 | 43 | 1976 | 11 | 1933 | 40 | 98.96% |
| 16NJ17.53 | 6   | 14  | 0.174 | 0.1607 | 2.05 | 9.0089  | 2.19 | 0.4065 | 0.55 | 2339 | 51 | 2199 | 12 | 2463 | 51 | 93.64% |



|           |     |     |       |        |      |         |      |        |      |      |     |      |    |      |    |        |
|-----------|-----|-----|-------|--------|------|---------|------|--------|------|------|-----|------|----|------|----|--------|
| 16NJ17.54 | 0   | 4   | 0.409 | 0.1019 | 2.35 | 0.9858  | 4.49 | 0.0687 | 2.87 | 697  | 31  | 428  | 12 | 1660 | 39 | 37.44% |
| 16NJ17.55 | 0   | 3   | 0.959 | 0.1180 | 3.19 | 1.4087  | 3.48 | 0.0878 | 2.34 | 893  | 31  | 542  | 13 | 1926 | 61 | 35.46% |
| 16NJ17.56 | 3   | 17  | 1.261 | 0.1123 | 2.14 | 2.1656  | 2.31 | 0.1398 | 0.63 | 1170 | 27  | 843  | 5  | 1837 | 39 | 61.25% |
| 16NJ17.57 | 2   | 4   | 0.316 | 0.1599 | 2.10 | 9.3955  | 2.27 | 0.4258 | 0.66 | 2377 | 54  | 2287 | 15 | 2455 | 52 | 96.04% |
| 16NJ17.58 | 2   | 8   | 1.575 | 0.1210 | 2.86 | 2.2623  | 3.51 | 0.1341 | 0.95 | 1201 | 42  | 811  | 8  | 1971 | 56 | 52.02% |
| 16NJ17.59 | 2   | 12  | 1.175 | 0.0717 | 2.22 | 1.2799  | 2.38 | 0.1293 | 0.54 | 837  | 20  | 784  | 4  | 978  | 22 | 93.25% |
| 16NJ17.60 | 1   | 5   | 0.896 | 0.0896 | 2.47 | 1.6763  | 2.93 | 0.1350 | 0.81 | 1000 | 29  | 816  | 7  | 1416 | 35 | 77.57% |
| 16NJ17.61 | 4   | 14  | 1.977 | 0.0967 | 2.46 | 1.8485  | 2.64 | 0.1387 | 0.87 | 1063 | 28  | 837  | 7  | 1562 | 38 | 73.03% |
| 16NJ17.62 | 1   | 4   | 0.402 | 0.0959 | 2.39 | 3.0935  | 2.57 | 0.2336 | 0.59 | 1431 | 37  | 1354 | 8  | 1546 | 37 | 94.27% |
| 16NJ17.63 | 0   | 4   | 0.176 | 0.0942 | 2.92 | 0.9776  | 3.11 | 0.0751 | 0.57 | 692  | 22  | 467  | 3  | 1512 | 44 | 51.71% |
| 16NJ17.64 | 1   | 6   | 1.001 | 0.0843 | 2.75 | 0.9164  | 3.41 | 0.0780 | 0.92 | 660  | 22  | 484  | 4  | 1299 | 36 | 63.59% |
| 16NJ17.65 | 5   | 10  | 0.46  | 0.2165 | 2.21 | 13.0890 | 2.57 | 0.4368 | 0.89 | 2686 | 69  | 2336 | 21 | 2955 | 65 | 85.03% |
| 16NJ17.66 | 0   | 5   | 0.273 | 0.1216 | 2.20 | 1.7304  | 2.52 | 0.1031 | 1.05 | 1020 | 26  | 633  | 7  | 1980 | 44 | 38.81% |
| 16NJ17.68 | 0   | 1   | 0.621 | 0.0854 | 4.30 | 0.6830  | 6.04 | 0.0560 | 1.89 | 529  | 32  | 351  | 7  | 1325 | 57 | 49.61% |
| 16NJ17.69 | 3   | 9   | 0.198 | 0.1157 | 2.06 | 5.1219  | 2.24 | 0.3211 | 0.76 | 1840 | 41  | 1795 | 14 | 1892 | 39 | 97.52% |
| 16NJ17.70 | 551 | 307 | 0.469 | 0.1287 | 2.06 | 6.6390  | 2.19 | 0.3741 | 0.52 | 2065 | 45  | 2049 | 11 | 2081 | 43 | 99.22% |
| 16NJ17.71 | 734 | 386 | 1.81  | 0.0777 | 2.12 | 1.4160  | 2.25 | 0.1322 | 0.50 | 896  | 20  | 801  | 4  | 1139 | 24 | 88.12% |
| 16NJ17.72 | 69  | 115 | 0.465 | 0.1185 | 3.16 | 1.5471  | 6.49 | 0.0899 | 3.71 | 949  | 62  | 555  | 21 | 1933 | 61 | 28.94% |
| 16NJ17.73 | 517 | 192 | 0.734 | 0.1600 | 2.09 | 8.8007  | 2.23 | 0.3991 | 0.51 | 2318 | 52  | 2165 | 11 | 2456 | 51 | 92.95% |
| 16NJ17.74 | 488 | 111 | 1.183 | 0.1991 | 2.21 | 10.8231 | 2.36 | 0.3950 | 0.70 | 2508 | 59  | 2146 | 15 | 2819 | 62 | 83.14% |
| 16NJ17.75 | 135 | 47  | 0.514 | 0.1699 | 2.54 | 8.5726  | 3.40 | 0.3617 | 1.21 | 2294 | 78  | 1990 | 24 | 2556 | 65 | 84.74% |
| 16NJ17.76 | 925 | 242 | 1.13  | 0.1605 | 2.10 | 9.2399  | 2.26 | 0.4183 | 0.51 | 2362 | 53  | 2253 | 11 | 2461 | 52 | 95.14% |
| 16NJ17.77 | 438 | 270 | 0.501 | 0.1218 | 2.15 | 5.5418  | 2.33 | 0.3307 | 0.54 | 1907 | 44  | 1842 | 10 | 1983 | 43 | 96.45% |
| 16NJ17.78 | 213 | 297 | 0.096 | 0.1223 | 2.18 | 5.2938  | 2.37 | 0.3149 | 0.67 | 1868 | 44  | 1765 | 12 | 1991 | 43 | 94.17% |
| 16NJ17.79 | 434 | 395 | 0.254 | 0.1399 | 2.23 | 5.7558  | 2.47 | 0.2994 | 0.68 | 1940 | 48  | 1688 | 11 | 2226 | 50 | 85.10% |
| 16NJ17.80 | 62  | 92  | 0.258 | 0.1148 | 2.87 | 2.3435  | 5.28 | 0.1435 | 3.10 | 1226 | 65  | 864  | 27 | 1877 | 54 | 58.18% |
| 16NJ17.81 | 125 | 267 | 0.261 | 0.0708 | 2.28 | 1.6249  | 2.45 | 0.1670 | 0.57 | 980  | 24  | 996  | 6  | 951  | 22 | 98.42% |
| 16NJ17.82 | 357 | 238 | 0.309 | 0.1632 | 2.16 | 10.1674 | 2.29 | 0.4524 | 0.56 | 2450 | 56  | 2406 | 14 | 2489 | 54 | 98.17% |
| 16NJ18.1  | 6   | 12  | 1.264 | 0.1483 | 2.38 | 8.7178  | 2.49 | 0.4253 | 0.72 | 2309 | 57  | 2285 | 17 | 2327 | 55 | 98.94% |
| 16NJ18.2  | 6   | 8   | 1.684 | 0.2359 | 2.14 | 15.0514 | 2.47 | 0.4611 | 0.84 | 2818 | 70  | 2444 | 20 | 3093 | 66 | 84.69% |
| 16NJ18.3  | 95  | 43  | 0.843 | 0.1409 | 1.96 | 7.3142  | 1.98 | 0.3764 | 0.56 | 2151 | 43  | 2060 | 12 | 2239 | 44 | 95.58% |
| 16NJ18.4  | 122 | 260 | 0.352 | 0.0771 | 1.77 | 1.6941  | 1.82 | 0.1592 | 0.56 | 1006 | 18  | 953  | 5  | 1125 | 20 | 94.36% |
| 16NJ18.5  | 182 | 495 | 0.72  | 0.0819 | 2.16 | 0.9290  | 2.16 | 0.0823 | 0.54 | 667  | 14  | 510  | 3  | 1244 | 27 | 69.11% |
| 16NJ18.6  | 430 | 421 | 0.309 | 0.1227 | 1.65 | 6.1997  | 1.74 | 0.3661 | 0.58 | 2004 | 35  | 2011 | 12 | 1996 | 33 | 99.68% |
| 16NJ18.7  | 270 | 219 | 0.511 | 0.1784 | 1.72 | 5.6482  | 1.81 | 0.2302 | 0.96 | 1923 | 35  | 1335 | 13 | 2638 | 45 | 55.96% |
| 16NJ18.9  | 32  | 50  | 1.027 | 0.1626 | 1.65 | 11.8633 | 1.76 | 0.5293 | 0.76 | 2594 | 46  | 2738 | 21 | 2483 | 41 | 94.72% |
| 16NJ18.10 | 4   | 12  | 0.49  | 0.2186 | 1.66 | 8.3691  | 2.36 | 0.2778 | 1.77 | 2272 | 54  | 1580 | 28 | 2970 | 49 | 56.24% |
| 16NJ18.11 | 1   | 5   | 0.243 | 0.1053 | 1.69 | 2.6474  | 1.77 | 0.1823 | 0.68 | 1314 | 23  | 1080 | 7  | 1720 | 29 | 78.30% |
| 16NJ18.12 | 5   | 18  | 0.757 | 0.1431 | 1.82 | 4.8941  | 1.92 | 0.2479 | 0.54 | 1801 | 35  | 1427 | 8  | 2265 | 41 | 73.81% |
| 16NJ18.13 | 0   | 1   | 0.597 | 0.0897 | 3.20 | 2.3957  | 3.35 | 0.1930 | 0.88 | 1241 | 42  | 1138 | 10 | 1420 | 45 | 90.88% |
| 16NJ18.14 | 1   | 5   | 0.461 | 0.0792 | 1.92 | 1.6867  | 1.99 | 0.1543 | 0.49 | 1004 | 20  | 925  | 5  | 1178 | 23 | 91.52% |
| 16NJ18.15 | 4   | 11  | 0.305 | 0.1565 | 2.18 | 7.3800  | 2.54 | 0.3403 | 0.67 | 2159 | 55  | 1888 | 13 | 2418 | 53 | 85.68% |
| 16NJ18.16 | 7   | 19  | 0.326 | 0.1568 | 1.81 | 7.5374  | 2.07 | 0.3478 | 0.66 | 2177 | 45  | 1924 | 13 | 2421 | 44 | 86.84% |
| 16NJ18.17 | 16  | 34  | 1.776 | 0.2739 | 1.77 | 10.5334 | 1.90 | 0.2788 | 0.64 | 2483 | 47  | 1585 | 10 | 3328 | 59 | 43.39% |
| 16NJ18.18 | 7   | 14  | 3.36  | 0.1247 | 2.01 | 2.8524  | 2.86 | 0.1642 | 1.35 | 1369 | 39  | 980  | 13 | 2025 | 41 | 60.26% |
| 16NJ18.19 | 6   | 14  | 0.712 | 0.1568 | 1.73 | 8.4745  | 2.19 | 0.3903 | 0.96 | 2283 | 50  | 2124 | 20 | 2422 | 42 | 92.52% |
| 16NJ18.20 | 1   | 6   | 0.573 | 0.1214 | 2.60 | 1.4984  | 2.92 | 0.0889 | 0.67 | 930  | 27  | 549  | 4  | 1978 | 51 | 30.70% |
| 16NJ18.21 | 4   | 12  | 0.346 | 0.1239 | 1.70 | 5.7849  | 1.87 | 0.3388 | 0.90 | 1944 | 36  | 1881 | 17 | 2014 | 34 | 96.62% |
| 16NJ18.22 | 6   | 13  | 0.37  | 0.1604 | 1.74 | 9.4081  | 1.80 | 0.4256 | 0.56 | 2379 | 43  | 2286 | 13 | 2459 | 43 | 95.94% |
| 16NJ18.23 | 0   | 3   | 0.063 | 0.0890 | 1.87 | 2.1665  | 2.03 | 0.1763 | 0.63 | 1170 | 24  | 1047 | 7  | 1404 | 26 | 88.20% |
| 16NJ18.24 | 90  | 158 | 0.185 | 0.3274 | 2.48 | 21.5134 | 3.20 | 0.4693 | 1.06 | 3162 | 101 | 2480 | 26 | 3605 | 89 | 72.51% |

|           |     |     |       |        |      |         |      |        |      |      |     |      |    |      |    |        |
|-----------|-----|-----|-------|--------|------|---------|------|--------|------|------|-----|------|----|------|----|--------|
| 16NJ18.27 | 12  | 18  | 2.626 | 0.3071 | 2.41 | 9.3380  | 4.55 | 0.2138 | 2.39 | 2372 | 108 | 1249 | 30 | 3506 | 84 | 10.11% |
| 16NJ18.28 | 1   | 8   | 1.191 | 0.0757 | 2.21 | 1.3632  | 2.20 | 0.1307 | 0.53 | 873  | 19  | 792  | 4  | 1087 | 24 | 89.76% |
| 16NJ18.30 | 2   | 6   | 0.33  | 0.1610 | 1.69 | 9.4860  | 1.85 | 0.4278 | 0.90 | 2386 | 44  | 2296 | 21 | 2466 | 42 | 96.07% |
| 16NJ18.31 | 8   | 15  | 1.087 | 0.1883 | 1.70 | 10.6356 | 2.07 | 0.4088 | 1.03 | 2492 | 52  | 2209 | 23 | 2728 | 46 | 87.22% |
| 16NJ18.32 | 568 | 448 | 0.363 | 0.1532 | 1.66 | 8.6438  | 1.85 | 0.4093 | 0.87 | 2301 | 43  | 2212 | 19 | 2383 | 40 | 95.95% |
| 16NJ18.33 | 118 | 57  | 0.469 | 0.1796 | 2.21 | 9.1142  | 2.56 | 0.3666 | 1.04 | 2350 | 60  | 2014 | 21 | 2649 | 59 | 83.32% |
| 16NJ18.34 | 223 | 75  | 1.416 | 0.1891 | 1.71 | 10.6518 | 1.82 | 0.4084 | 0.57 | 2493 | 45  | 2208 | 13 | 2735 | 47 | 87.06% |
| 16NJ18.35 | 32  | 40  | 0.726 | 0.1061 | 3.73 | 2.1355  | 3.79 | 0.1459 | 0.65 | 1160 | 44  | 878  | 6  | 1733 | 65 | 67.82% |
| 16NJ18.36 | 57  | 50  | 1.291 | 0.1320 | 3.23 | 2.5332  | 3.37 | 0.1388 | 0.60 | 1282 | 43  | 838  | 5  | 2125 | 69 | 47.05% |
| 16NJ18.37 | 208 | 21  | 0.878 | 0.6272 | 1.77 | 40.7307 | 2.80 | 0.4665 | 1.64 | 3789 | 106 | 2468 | 41 | 4572 | 81 | 46.50% |
| 16NJ18.39 | 163 | 619 | 0.385 | 0.1012 | 1.74 | 0.9685  | 1.81 | 0.0694 | 0.46 | 688  | 12  | 433  | 2  | 1646 | 29 | 41.01% |
| 16NJ19.1  | 65  | 72  | 0.874 | 0.1151 | 2.17 | 5.9161  | 2.18 | 0.3737 | 0.76 | 1964 | 43  | 2047 | 16 | 1882 | 41 | 95.94% |
| 16NJ19.2  | 11  | 57  | 0.438 | 0.0645 | 7.07 | 0.9697  | 7.44 | 0.1090 | 1.93 | 688  | 51  | 667  | 13 | 759  | 54 | 96.83% |
| 16NJ19.3  | 78  | 208 | 0.882 | 0.0721 | 3.29 | 1.3771  | 4.19 | 0.1372 | 1.04 | 879  | 37  | 829  | 9  | 987  | 33 | 93.92% |
| 16NJ19.4  | 168 | 242 | 2.262 | 0.0834 | 1.54 | 1.8194  | 1.67 | 0.1587 | 1.09 | 1052 | 18  | 950  | 10 | 1278 | 20 | 89.18% |
| 16NJ19.6  | 26  | 259 | 0.416 | 0.0629 | 2.65 | 0.4243  | 2.75 | 0.0489 | 0.66 | 359  | 10  | 308  | 2  | 705  | 19 | 83.29% |
| 16NJ19.7  | 18  | 207 | 0.678 | 0.0528 | 5.53 | 0.2374  | 5.60 | 0.0327 | 0.71 | 216  | 12  | 207  | 1  | 321  | 18 | 95.71% |
| 16NJ19.8  | 17  | 223 | 0.513 | 0.0562 | 4.87 | 0.2544  | 5.25 | 0.0328 | 0.75 | 230  | 12  | 208  | 2  | 460  | 22 | 89.23% |
| 16NJ19.9  | 0   | 3   | 0.958 | 0.0632 | 2.87 | 0.4375  | 3.27 | 0.0499 | 0.78 | 369  | 12  | 314  | 2  | 714  | 21 | 82.71% |
| 16NJ19.10 | 41  | 98  | 0.913 | 0.0660 | 3.86 | 1.1693  | 4.21 | 0.1278 | 0.59 | 786  | 33  | 775  | 5  | 807  | 31 | 98.55% |
| 16NJ19.11 | 57  | 69  | 1.296 | 0.1707 | 1.60 | 4.0567  | 1.76 | 0.1726 | 0.88 | 1646 | 29  | 1026 | 9  | 2564 | 41 | 39.64% |
| 16NJ19.12 | 29  | 238 | 0.253 | 0.0589 | 2.47 | 0.5702  | 2.51 | 0.0703 | 0.53 | 458  | 11  | 438  | 2  | 562  | 14 | 95.43% |
| 16NJ19.13 | 87  | 226 | 0.876 | 0.0733 | 1.61 | 1.4827  | 1.74 | 0.1467 | 0.67 | 923  | 16  | 882  | 6  | 1023 | 16 | 95.35% |
| 16NJ19.14 | 212 | 239 | 2.109 | 0.1110 | 2.02 | 2.0695  | 2.06 | 0.1354 | 0.66 | 1139 | 23  | 818  | 5  | 1816 | 37 | 60.86% |
| 16NJ19.15 | 83  | 577 | 0.366 | 0.0937 | 1.56 | 0.9200  | 1.85 | 0.0712 | 1.01 | 662  | 12  | 443  | 4  | 1503 | 24 | 50.59% |
| 16NJ19.16 | 26  | 166 | 0.185 | 0.0734 | 2.18 | 0.9790  | 2.43 | 0.0966 | 0.79 | 693  | 17  | 595  | 5  | 1024 | 22 | 83.46% |

## References

- Liu, J., and Zhao, J. (1924). Geology of Jiangsu. Geological Bulletin Series A 4.
- Hsieh, C.Y. (1928). Geology of Chung Shan and its bearing on the supply of artesian water in Nanking. Bulletin of the Geological Society of China 7, 139-152.
- Li, Y., Li, J., and Zhu, S. (1935). Geology of Ningzhen Mountain, Volume 11, (nanjing: Geological Institute).
- Sze, H.C., and Chow, T.Y. (1962). Mesozoic continental deposits of China, (Beijing: Science Press).
- Ju, K. (1987). Subdivision of the Lower-Middle Jurassic strata in south Jiangsu. Bulletin of Nanjing Institute of Geology and Mineral Resources, Chinese Academy of Geological Sciences 8, 33-44.
- Cao, Z.-Y. (1982). On the occurrence of *Scoresbya* from Jiangsu and *Weichselia* from Zhejiang. Acta Palaeontologica Sinica 21, 343-348.
- Zhou, Z., and Li, P. (1980). A palaeobotanical approach to the classification, correlation and geological ages of the non-marine Mesozoic deposits of China. In Scientific papers on geology for international exchange prepared for the 26th International Geological Congress. 4. Stratigraphy and palaeontology. (Beijing: Geological Publishing House), pp. 82-91.
- Wang, G., Chen, Q., Li, Y., Lan, S., and Ju, K. (1982). Kingdom plant (Mesozoic), (Beijing: Geological Publishing House).
- Huang, Q. (1983). The Early Jurassic Xiangshan Flora from the Yangzi River Valley in Anhui province of eastern China. Earth Science -- Journal of Wuhan College of Geology 20, 25-36.
- Huang, Q. (1988). Vertical diversities of the Early Jurassic plant fossils in the middle-lower Changjiang valley. Geological Review 34, 193-202.
- Cao, Z.-Y. (1998). A study on the cuticles of some bennettitaleans from the lower part of Xiangshan Group in Jiangsu and Anhui provinces. Acta Palaeontologica Sinica 37, 283-294.
- Cao, Z.-Y. (2000). Some specimens of gymnospermae from the lower part of Xiangshan Group in Jiangsu and Anhui provinces with study on their cuticles. Acta Palaeontologica Sinica 39, 334-342.
- Santos, A., Wang, X., Fu, Q., and Diez, J.B. (in progress). First palynological data of the Beixiangshan Formation in the Nanjing area. Geobios.
- Thomas, H.H. (1925). The Caytoniales, a new group of angiospermous plants from the Jurassic rocks of Yorkshire. Philosophic Transaction of Royal Society London 213B, 299-363, Plates 211-215.
- Doyle, J.A. (2006). Seed ferns and the origin of angiosperms. Journal of Torrey Botanical Society 133, 169-209.
- Taylor, T.N., Taylor, E.L., and Krings, M. (2009). Paleobotany: the biology and evolution of fossil plants, 2nd Edition, (Amsterdam: Elsevier).
- Zhou, Z., and Zheng, S. (2003). The missing link in *Ginkgo* evolution. Nature 423, 821-822.

- 
18. Schweitzer, H.-J. (1977). Die Rätio-Jurassischen floren des Iran und Afghanistans. 4. Die Rätische zwitterblüte *Irania hermaphroditic* nov. spec. und ihre bedeutung für die Phylogenie der angiospermen. *Paläontographica B* 161, 98-145.
  19. Crane, P.R. (1985). Phylogenetic analysis of seed plants and the origin of angiosperms. *Annals Missouri Botanical Garden* 72, 716-793.
  20. Rothwell, G.W., Crepet, W.L., and Stockey, R.A. (2009). Is the anthophyte hypothesis alive and well? New evidence from the reproductive structures of Bennettitales. *American Journal of Botany* 96, 296-322.
  21. Biswas, C., and Johri, B.M. (1997). *The gymnosperms*, (Berlin: Springer-Verlag).
  22. Martens, P. (1971). *Les gnetophytes*, (Berlin: Gebrueder Borntraeger).
  23. Wang, X., Duan, S., Geng, B., Cui, J., and Yang, Y. (2007). *Schmeissneria*: A missing link to angiosperms? *BMC Evolutionary Biology* 7, 14.
  24. Wang, X., and Wang, S. (2010). *Xingxueanthus*: an enigmatic Jurassic seed plant and its implications for the origin of angiospermy. *Acta Geologica Sinica* 84, 47-55.
  25. Han, G., Liu, Z.-J., Liu, X., Mao, L., Jacques, F.M.B., and Wang, X. (2016). A whole plant herbaceous angiosperm from the Middle Jurassic of China. *Acta Geologica Sinica* 90, 19-29.
  26. Liu, Z.-J., and Wang, X. (2016). A perfect flower from the Jurassic of China. *Historical Biology* 28, 707-719.
